# Supplementary material
Source: PubMed Central journal article supplement (PMC2921967)

**$\alpha$ -Selective Ni-Catalyzed Hydroalumination of Aryl and Alkyl-Substituted Terminal Alkynes. Practical Syntheses of Internal Vinyl Aluminums, Halides or Boronates**

Fang Gao and Amir H. Hoveyda\*

*Department of Chemistry, Merkert Chemistry Center,  
Boston College, Chestnut Hill, Massachusetts 02467*

**SUPPORTING INFORMATION, PART II**

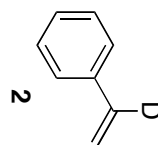

Sample: FG-III-281-D  
 Samps/6: IPr-cd020091113\_007  
 File: /home/ahh/vnmr/sys/data/FG-III-281-D.fid  
 SAMPLE SPECIAL  
 Pulse Sequence: zgpg30 temp 25.0  
 solvent cdcl3 gain not used  
 file /home/ahh/vnmr/spin 20  
 rsys/data/FG-III-281-D.fid hst 0.008  
 III-281-D.fid pw90 11.000  
 ACQUISITION 10.000  
 SW 6410.3  
 at 2.049 11  
 np 26264 1n  
 fb 4000 dp  
 bs 32 hs  
 ss 2  
 DI 1.000 fn  
 nt 8  
 ct 8  
 TRANSMITTER 8 SP  
 tn 7 WP  
 strq 399.786 rfp 3997.8  
 tof 399.8 rfp 3701.2  
 tpwr 60 1p 2902.4  
 pw 5.500 PLOT 101.3  
 DECOUPLER WC 250  
 dn C13 SC 0  
 dof 0 VS 3000  
 dm 0 VS 3000  
 dmm nmn th 50  
 dpwr C ai  
 dmf 29412 ph

PROCESsing 65536  
 DISPLAY -200.0  
 3997.8  
 3701.2  
 2902.4  
 101.3

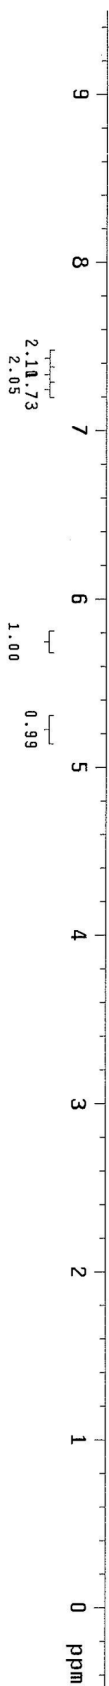



Sample: FG-III-211-B-D  
 SampleID: I:\prospect\0090830\_008  
 File: /home/ahn/vnmrSYS/data/FG-III-211-B-D.fid  
 SPECIAL

PARAMETER: 290K 1 temp 28.0  
 solvent cdcl3 gain not used  
 file /home/ahn/vnmr spin not used  
 rsys/data/FG-III-211-B-D.fid pw90 0.008  
 III-211-B-D.fid pw90 1.000  
 ACQUISITION alfa 10.000

SW 6410.3 f1  
 ac 2.049 f1  
 np 26264 in  
 td 4000 dp  
 ds 32 hs  
 ss 2  
 d1 1.000 fn  
 nt 8  
 ct 8

TRANSMITTER H1  
 tn wp  
 strq 399.786 rfp  
 lof 399.8 rfp  
 tpwr 60 tp  
 pw 5.500

DECOUPLER WC  
 dn C13  
 dof 0 vs  
 dm 0 th  
 dmm nn  
 dpwr C  
 dmf 35  
 294112

PH

PROCESSING  
 DISPLAY 65536  
 -200.0  
 3997.8  
 3702.4  
 2902.4  
 82.2  
 0

PLOT  
 250  
 0  
 400  
 50

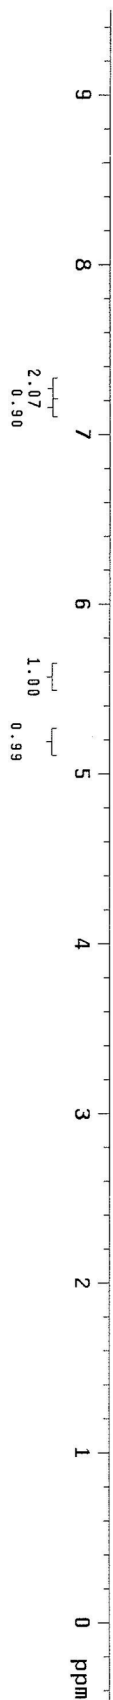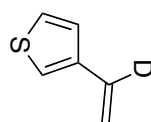

entry 11, Table 2



```

Sample: FC-1V-032-D-pdt
Name: FC-1V-032-D-pdt
File: /home/brh/mms/sgs/data/FC-1V-132-D-pdt.fid
PulseProgram: zgpg30
Solvent: cdc13
Acquisition: 6410.3
Processing: 55396
Display: 3997.8
Plot: 380
  
```

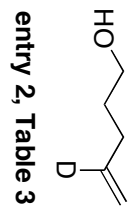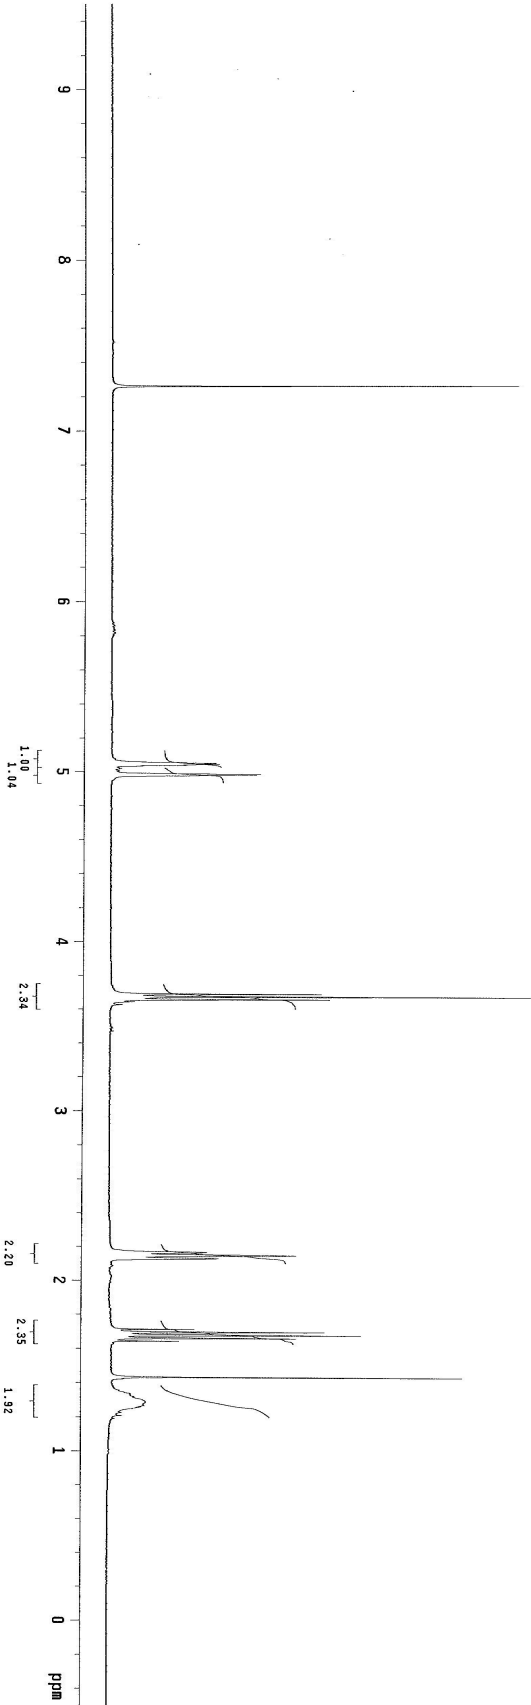

Sample: FG-III-204-B-D  
 Sample IPr: 09090826\_002  
 File: /home/ahh/vnmr/sys/data/fang/FG-III-204-B-D.fid  
 SAMPLE SPECIAL  
 Name: 29412  
 Date: 2004-08-10  
 Time: 10:00  
 Pulse Sequence: zgpg30  
 Solvent: CDCl3  
 Title: /home/ahh/vnmr/sys/data/fang/FG-III-204-B-D.fid  
 F2: 204.830 MHz  
 F1: 204.830 MHz  
 ACQUISITION  
 SW 6410.3 Hz  
 AT 2.049 s  
 NP 26264  
 FD 4000  
 BS 32  
 SS 2  
 DI 1.000 s  
 NT 8  
 CT 8  
 TRANSMITTER H1  
 TN H1  
 SFRQ 399.786 MHz  
 TOF 399.8 MHz  
 TP 60  
 PW 5.500  
 DECOUPLER C13  
 DN C13  
 DOF 0  
 DM nnn  
 DMM th  
 C at  
 DPWR 35  
 DMF 29412

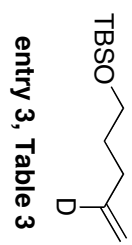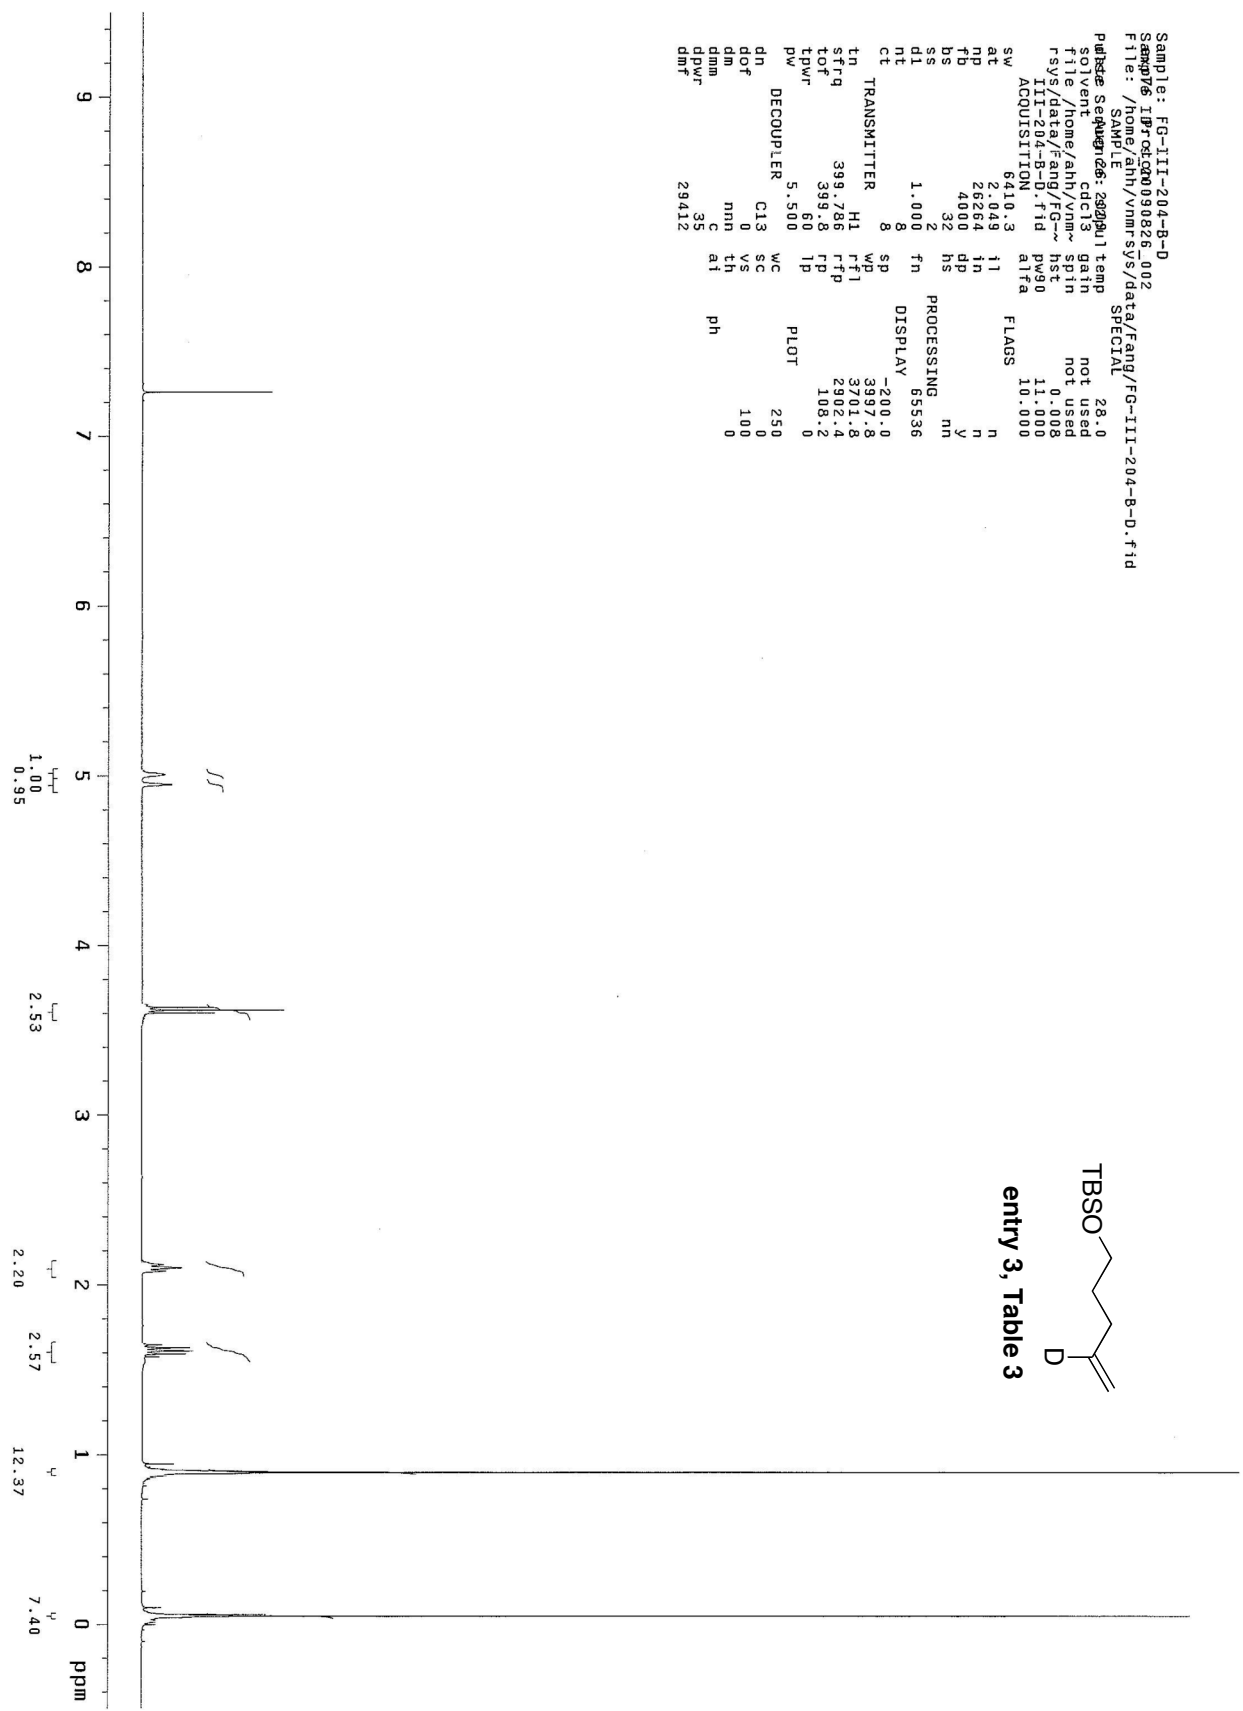

Sample: FG-IV-019-D  
 Sexp076 IPrc08091217\_004  
 File: /home/abh/vnmr-sys/data/Fang/FG-IV-019-D.fid  
 SPECIAL  
 pubSize: SeqLen: 280961 temp 25.0  
 solvent cdcl3 gain not used  
 file /home/abh/vnmr-sys/data/Fang/FG-IV-019-D.fid hsf 0.008  
 rsys/data/Fang/FG-IV-019-D.fid pw90 11.000  
 ACQUISITION: 6410.3 atfa 10.000  
 SW 2.049 f1  
 AT 26284 in  
 NP 4090 dp  
 DS 32 ns  
 SS 2  
 DI 1.000 fn  
 NT 8  
 CT 8  
 TRANSMITTER H1 SP  
 tn WP 300.0  
 stfq H1 rftl 3997.8  
 tof rfp 3702.2  
 tpwr 399.8 rfp 2902.4  
 pw 60 lp 159.6  
 DECOUPLER WC PLOT  
 dn C13 SC 250  
 dof 0 VS 0  
 dm 0 th 700  
 dmm C at  
 dpwr 35  
 dmf 29412

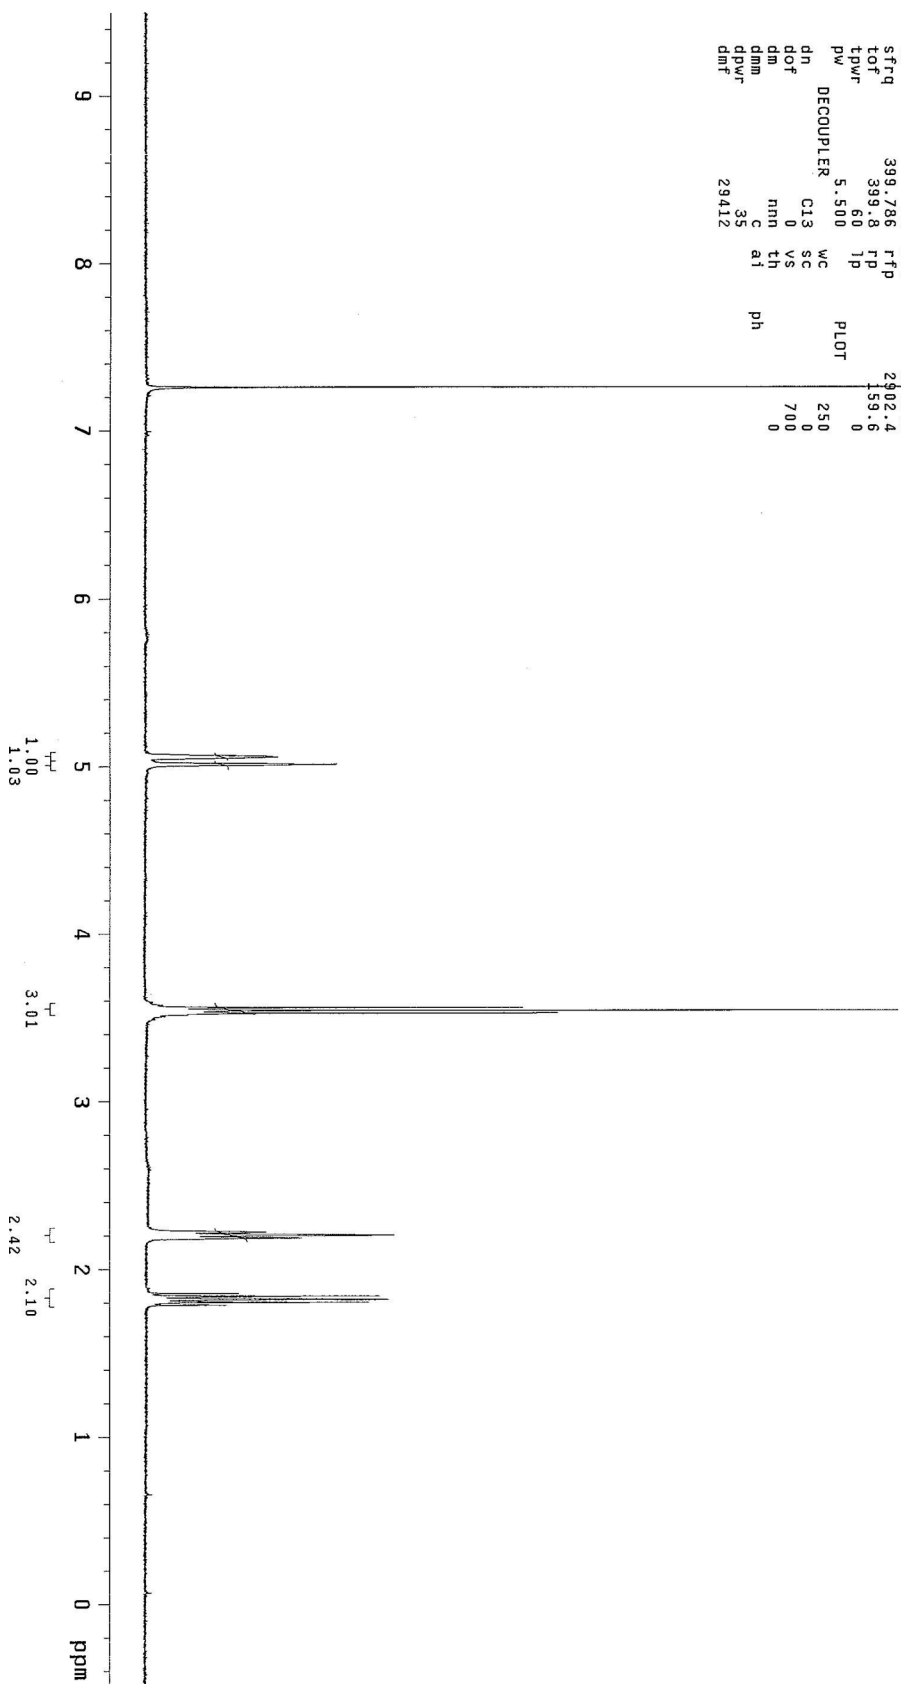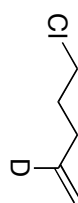

entry 4, Table 3

Sample: FG-IV-281-A-pdt  
 Sample: FG-IV-281-A-pdt  
 File: s\_20100520\_12\data/cdcl3\_01.fid  
 File: s\_20100520\_12\data/cdcl3\_01.fid  
 Sample: SPECIAL  
 Pulse Sequence: zgpg30  
 Date\_Time: 20100520 10:00  
 Solvent: cdcl3  
 F1: 201.263  
 F2: 201.263  
 F3: 201.263  
 F4: 201.263  
 F5: 201.263  
 F6: 201.263  
 F7: 201.263  
 F8: 201.263  
 F9: 201.263  
 F10: 201.263  
 F11: 201.263  
 F12: 201.263  
 F13: 201.263  
 F14: 201.263  
 F15: 201.263  
 F16: 201.263  
 F17: 201.263  
 F18: 201.263  
 F19: 201.263  
 F20: 201.263  
 F21: 201.263  
 F22: 201.263  
 F23: 201.263  
 F24: 201.263  
 F25: 201.263  
 F26: 201.263  
 F27: 201.263  
 F28: 201.263  
 F29: 201.263  
 F30: 201.263  
 F31: 201.263  
 F32: 201.263  
 F33: 201.263  
 F34: 201.263  
 F35: 201.263  
 F36: 201.263  
 F37: 201.263  
 F38: 201.263  
 F39: 201.263  
 F40: 201.263  
 F41: 201.263  
 F42: 201.263  
 F43: 201.263  
 F44: 201.263  
 F45: 201.263  
 F46: 201.263  
 F47: 201.263  
 F48: 201.263  
 F49: 201.263  
 F50: 201.263  
 F51: 201.263  
 F52: 201.263  
 F53: 201.263  
 F54: 201.263  
 F55: 201.263  
 F56: 201.263  
 F57: 201.263  
 F58: 201.263  
 F59: 201.263  
 F60: 201.263  
 F61: 201.263  
 F62: 201.263  
 F63: 201.263  
 F64: 201.263  
 F65: 201.263  
 F66: 201.263  
 F67: 201.263  
 F68: 201.263  
 F69: 201.263  
 F70: 201.263  
 F71: 201.263  
 F72: 201.263  
 F73: 201.263  
 F74: 201.263  
 F75: 201.263  
 F76: 201.263  
 F77: 201.263  
 F78: 201.263  
 F79: 201.263  
 F80: 201.263  
 F81: 201.263  
 F82: 201.263  
 F83: 201.263  
 F84: 201.263  
 F85: 201.263  
 F86: 201.263  
 F87: 201.263  
 F88: 201.263  
 F89: 201.263  
 F90: 201.263  
 F91: 201.263  
 F92: 201.263  
 F93: 201.263  
 F94: 201.263  
 F95: 201.263  
 F96: 201.263  
 F97: 201.263  
 F98: 201.263  
 F99: 201.263  
 F100: 201.263  
 F101: 201.263  
 F102: 201.263  
 F103: 201.263  
 F104: 201.263  
 F105: 201.263  
 F106: 201.263  
 F107: 201.263  
 F108: 201.263  
 F109: 201.263  
 F110: 201.263  
 F111: 201.263  
 F112: 201.263  
 F113: 201.263  
 F114: 201.263  
 F115: 201.263  
 F116: 201.263  
 F117: 201.263  
 F118: 201.263  
 F119: 201.263  
 F120: 201.263  
 F121: 201.263  
 F122: 201.263  
 F123: 201.263  
 F124: 201.263  
 F125: 201.263  
 F126: 201.263  
 F127: 201.263  
 F128: 201.263  
 F129: 201.263  
 F130: 201.263  
 F131: 201.263  
 F132: 201.263  
 F133: 201.263  
 F134: 201.263  
 F135: 201.263  
 F136: 201.263  
 F137: 201.263  
 F138: 201.263  
 F139: 201.263  
 F140: 201.263  
 F141: 201.263  
 F142: 201.263  
 F143: 201.263  
 F144: 201.263  
 F145: 201.263  
 F146: 201.263  
 F147: 201.263  
 F148: 201.263  
 F149: 201.263  
 F150: 201.263  
 F151: 201.263  
 F152: 201.263  
 F153: 201.263  
 F154: 201.263  
 F155: 201.263  
 F156: 201.263  
 F157: 201.263  
 F158: 2.64  
 F159: 1.10  
 F160: 1.00  
 F161: 0.97  
 F162: 1.90  
 F163: 2.4226  
 F164: 4.607  
 F165: 1.89

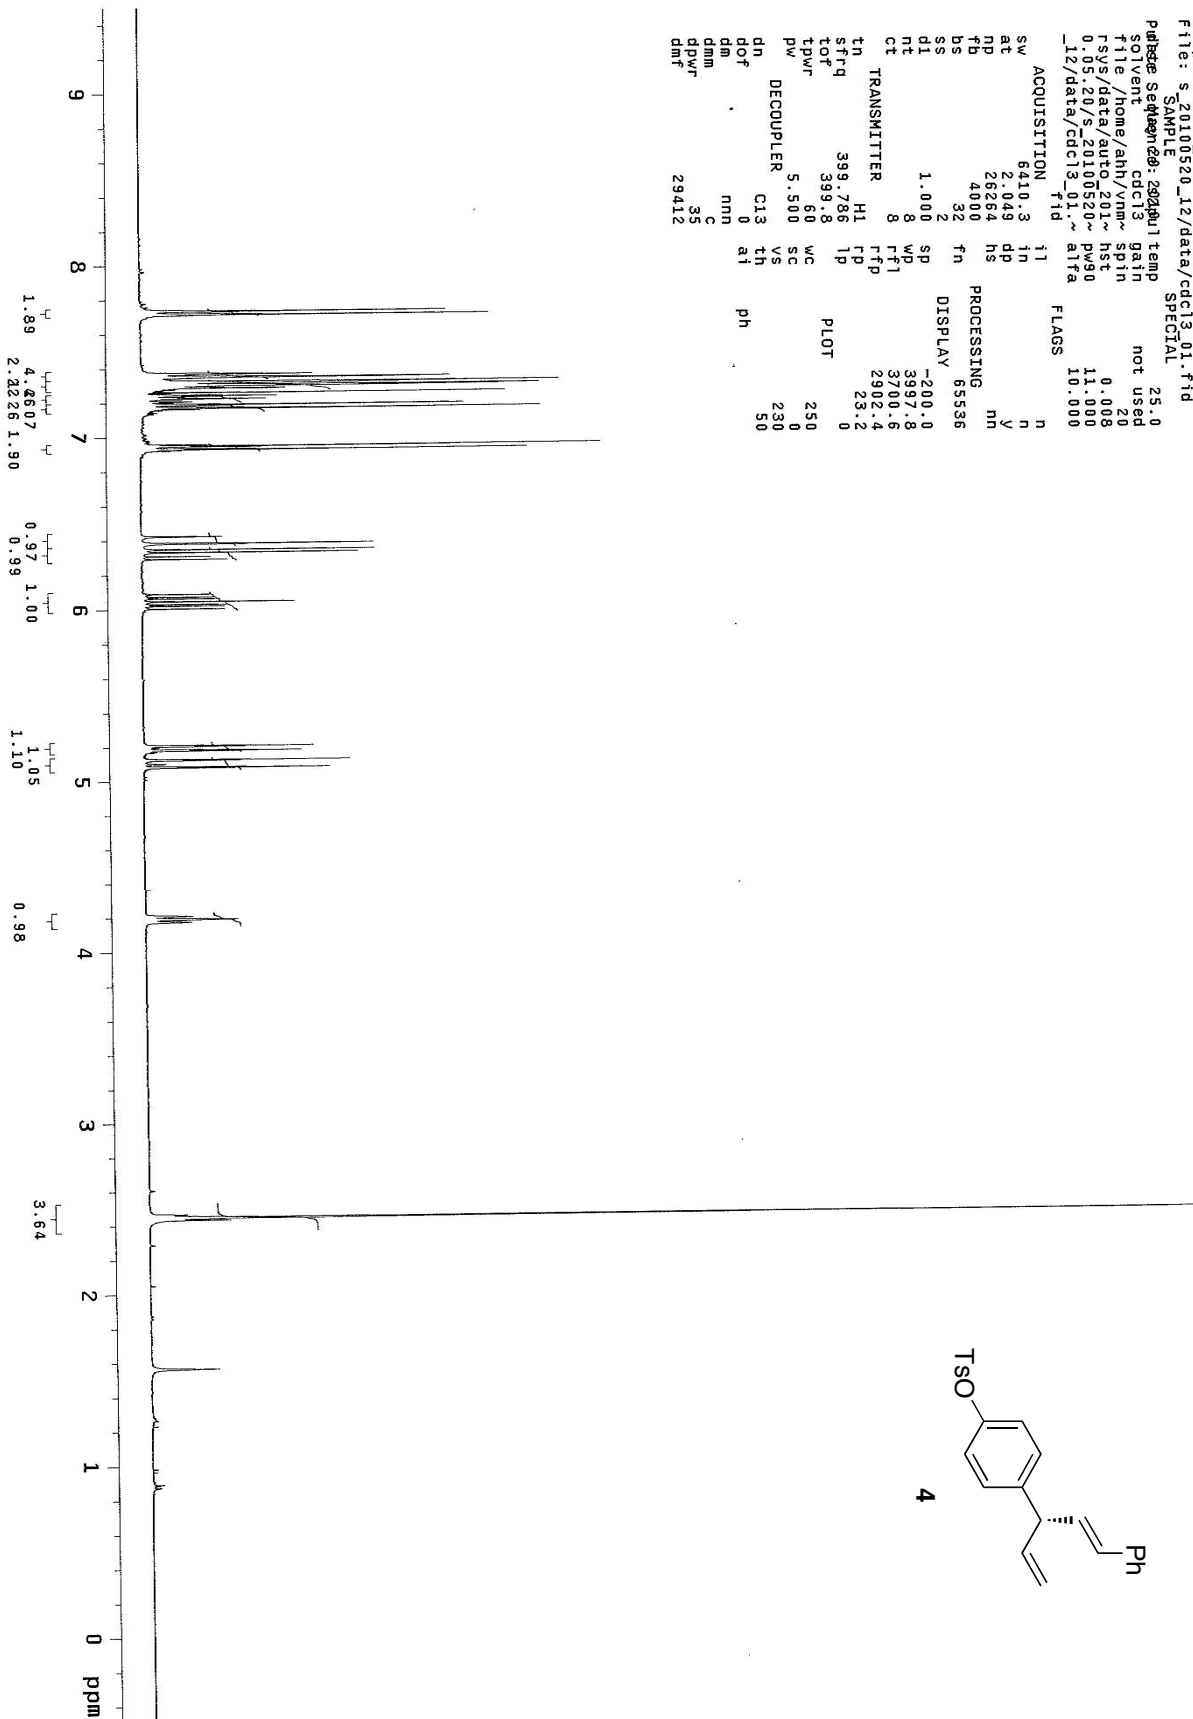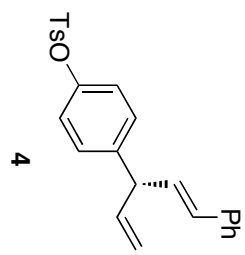

Sample: F3-IV-27-A-pdt-1H  
 F1: 1H NMR  
 Pulse Sequence: zgpg30  
 date: Apr 29 2010 temp: SPECIAL 25.0  
 solvent: cdcl3 gain: not used  
 file: ACQUISITION exp spin 0.020  
 SW ACQUISITION: 8012.8 MHz 7.600  
 at: 2.749 offset 10.000  
 pp: 32839 f1  
 bs: 400 d in n  
 ss: 2 dp n  
 d1: 1.000 hs PROCESSING: nm  
 nt: 40 tn DISPLAY: 85336  
 TRANSMITTER: 40  
 tn: -50.1  
 fh: 493.869 HI SP  
 stf: 493.869 MHz 488.7  
 f1: 493.869 MHz 488.7  
 tpw: 51 rfp 38229.2  
 pv: 3.800 fp 117.7  
 do: DECOUPLER: C13 PLOT: 0  
 dof: 0 wc 380  
 da: mm sc 40  
 dm: 5 vs 40  
 de: 3 vs 12  
 def: 32256 ai ph

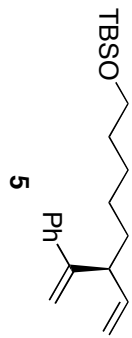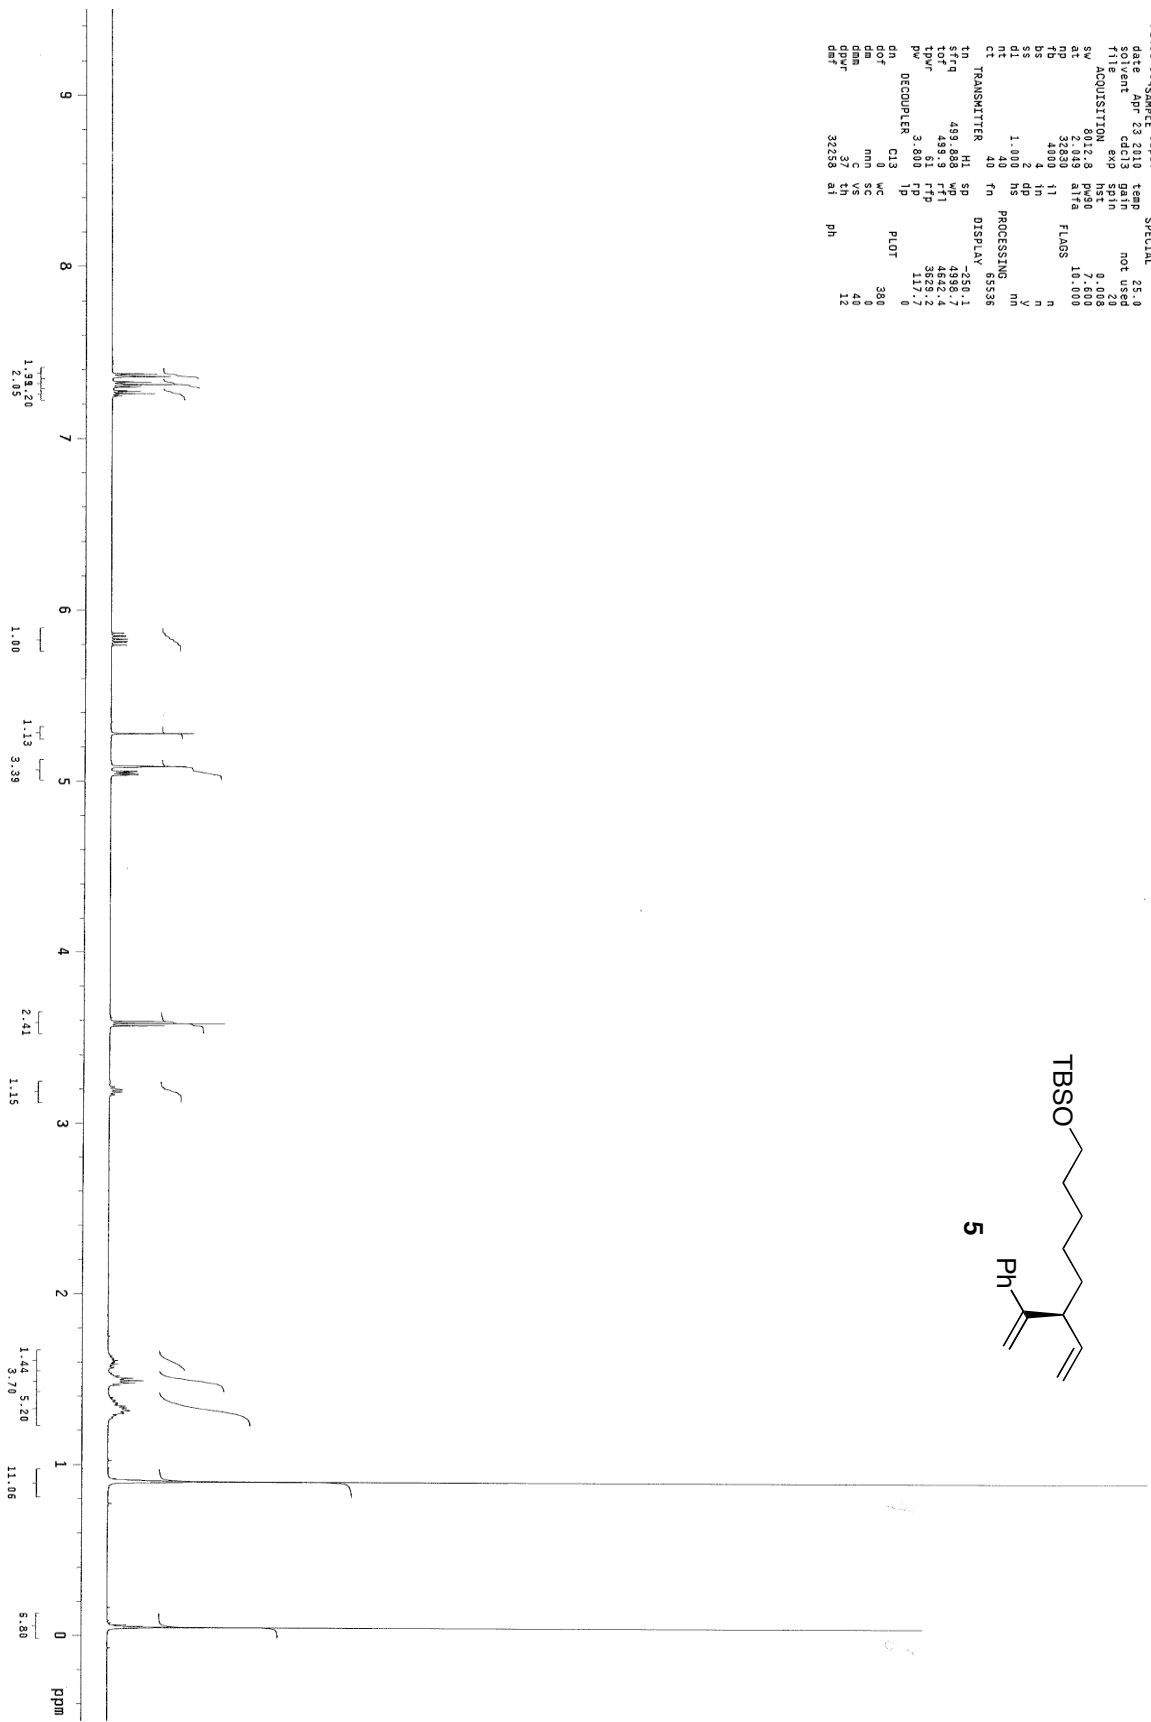

Sample: FG-IV-258-B-pdt  
 Sample Path: s20100507\_09  
 File: s\_20100507\_09\data/cdcl3\_01.fid  
 SPECIAL  
 PULSE SEQUENCE: zgpg1 temp 25.0  
 solvent cdcl3 gain not used  
 file /home/ah/vnm~ spin 20  
 rsys/data/auto\_201~ hst 0.008  
 0.05\_07\_01/s\_20100~ pw90 11.000  
 507\_09/data/cdcl3~ atfa 10.000  
 01.fid  
 ACQUISITION  
 sw 6410.3 f1  
 at 2.049 dp  
 np 26254 hs  
 fb 4000  
 bs 32 fn  
 ss 1.000 sp  
 dl 8 wd  
 nl 8 rfl  
 ct 8 rfp  
 TRANSMITTER H1  
 tn 399.728 lp  
 strq 399.728 wc  
 tot 60 sc  
 tpwr 5.500  
 pw DECOUPLER C13  
 dn 0 at  
 dof 0  
 dm nnn  
 dmm C  
 dpwr 35  
 dmf 29412

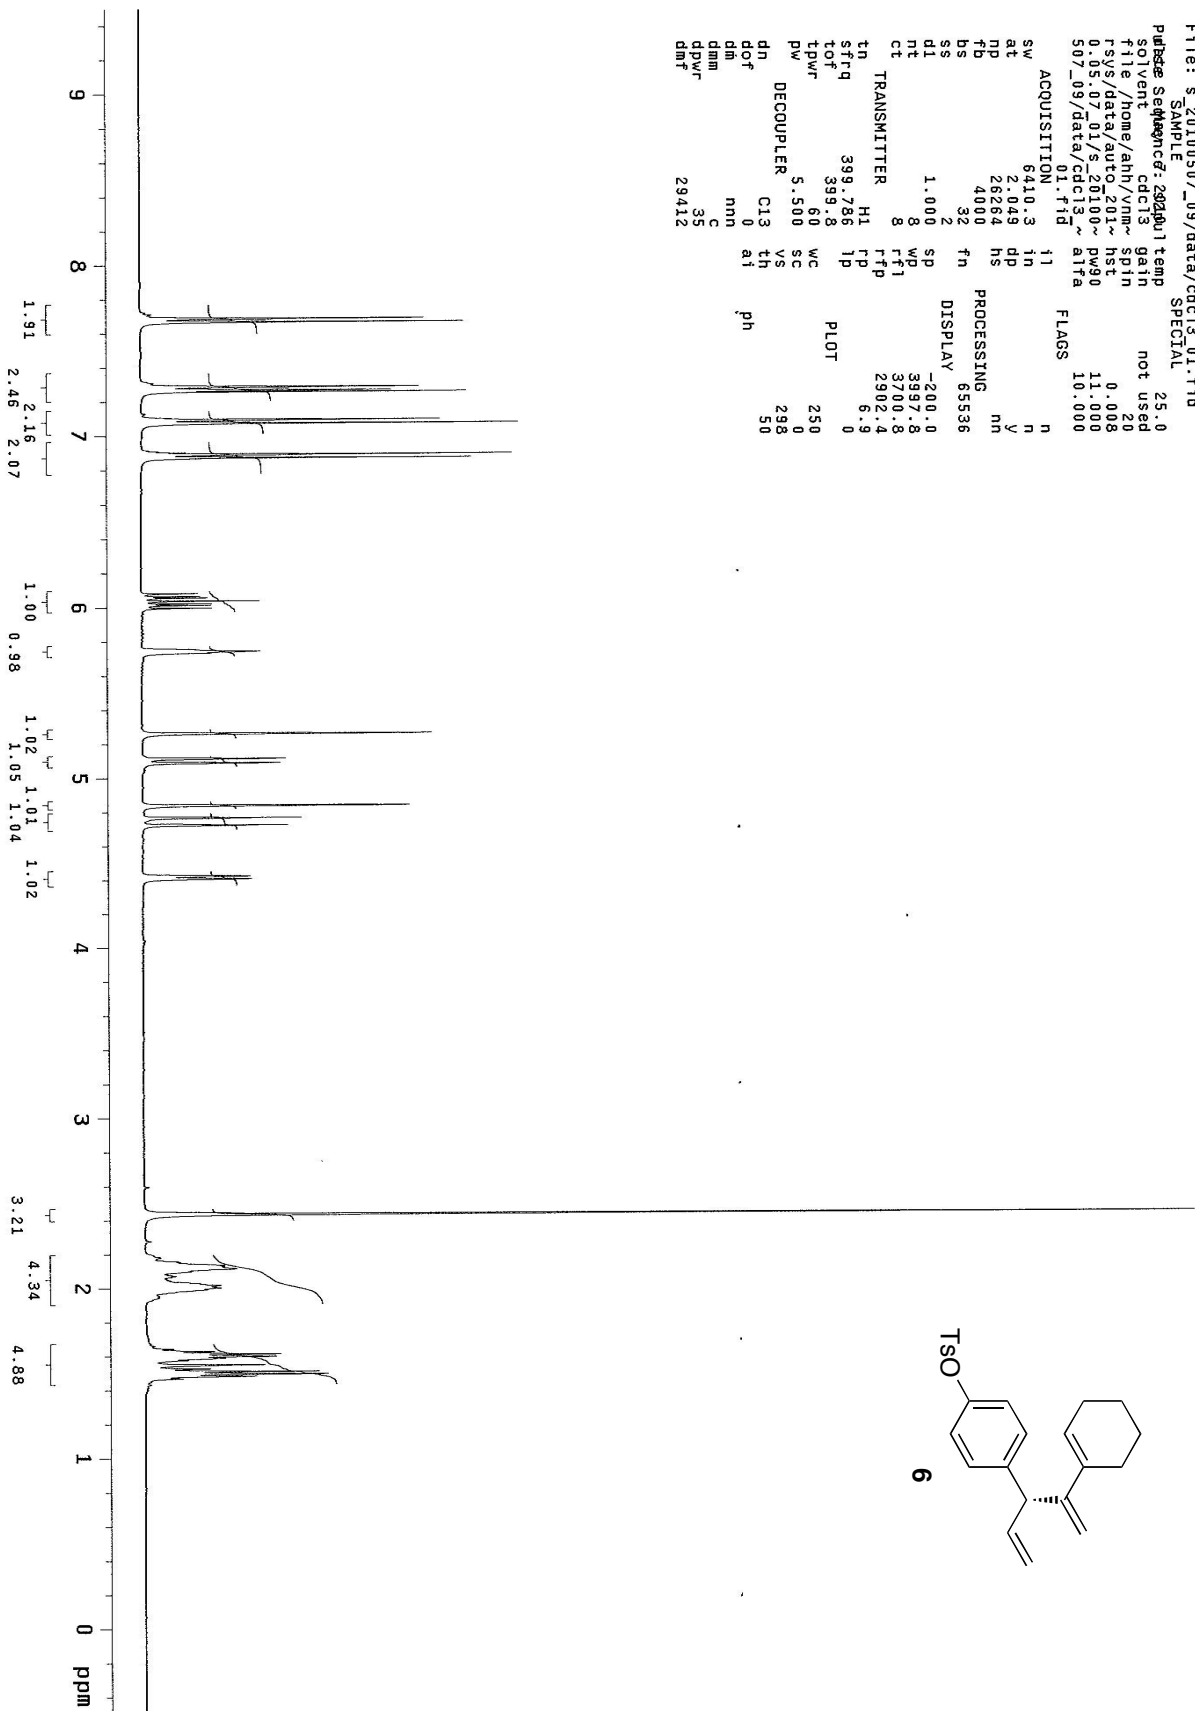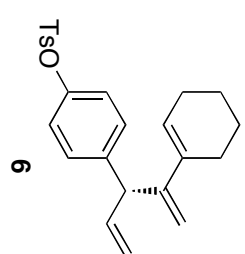

Sample: FG-IV-235-pdt  
 F1exp1 exp101

|                       |         |          |
|-----------------------|---------|----------|
| pulse sequence: s2pu] | SPECIAL | 25.0     |
| date: Apr 27 2010     | temp    | not used |
| solvent: cdcl3        | gain    | 20       |
| file                  | SPIN    | 0.008    |
| ACQUISITION: exp      | hst     | 9.400    |
| sw: 6410.3            | rtfa    | 10.000   |
| at: 2.049             | pw90    |          |
| nd: 26264             | FLAOS   |          |
| bs: 4000              | i1      | n        |
| se: 4                 | in      | n        |
| si: 2                 | dd      | y        |
| di: 1.000             | hs      | n        |
| nt: 40                | fn      | 65536    |
| ct: 40                | fn      | 65536    |
| TRANSMITTER: H1       | SD      | -199.9   |
| strq: 399.763         | WD      | 3087.8   |
| tot: 399.8            | rf1     | 301.6    |
| tpwr: 62              | rfp     | 2902.3   |
| pw: 4.700             | tp      | -174.0   |
| DECOUPLER: C13        | IP      | 0        |
| dn: 0                 | WC      | 250      |
| dof: 0                | SC      | 0        |
| dm: nnn               | VS      | 133      |
| dmm: C                | th      | 7        |
| dpwr: 35              | ph      |          |
| dmt: 29412            | at1     |          |

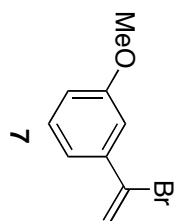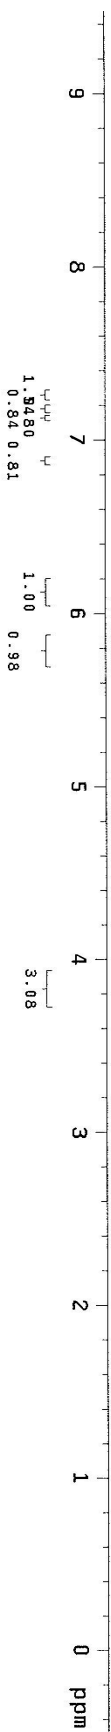

Sample: PG-II-662-B-p11  
S12  
File: J:\GC\DATA\GC\DATA\GC-II-662-B-p11.FID  
Date: 03/13/98 12:03:28  
Pulse Sequence: S.M13 temp SPECIAL 25.0  
solvent cdc13 gain not used  
file name: ah/vnm spin 0.000  
f2: 50.000 MHz  
f1: 262.500 MHz  
AQ 10.000  
ACQUISITION 640.0 11  
S/W 640.0 11  
AT 2.000 11  
FID 2.000 11  
FB 4000 00  
BS 32 HS  
SS 1.000  
SC 8 SP  
CT 8 SP FID DISPLAY 55536  
TRANSMITTER M1 WPI  
ST 389.788 3897.8  
TOT 389.788 FP 2.000  
TPWR 50 TP 15.8  
PW DECOUPLER: 5.000  
dn 013 SC 380  
dot 0 VS 140  
da mm th 5  
c at ph  
dpr 29412

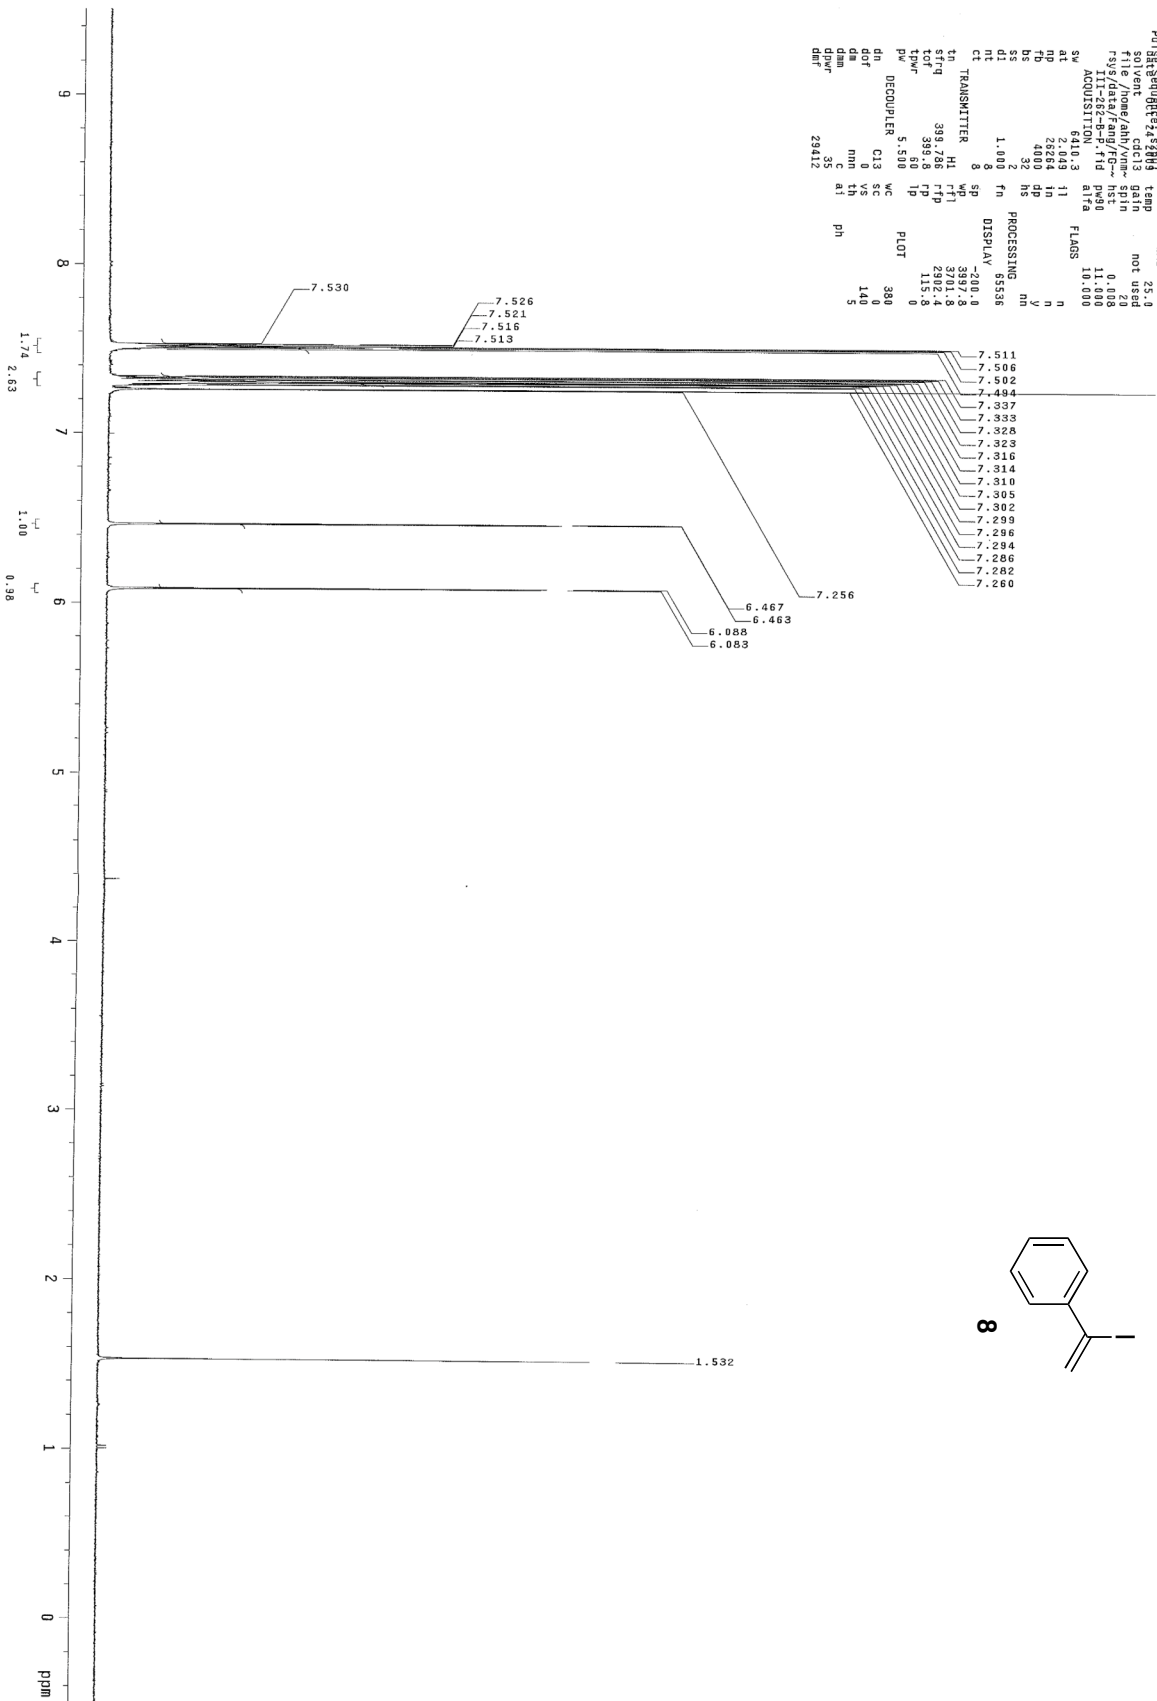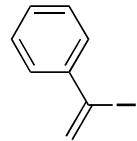



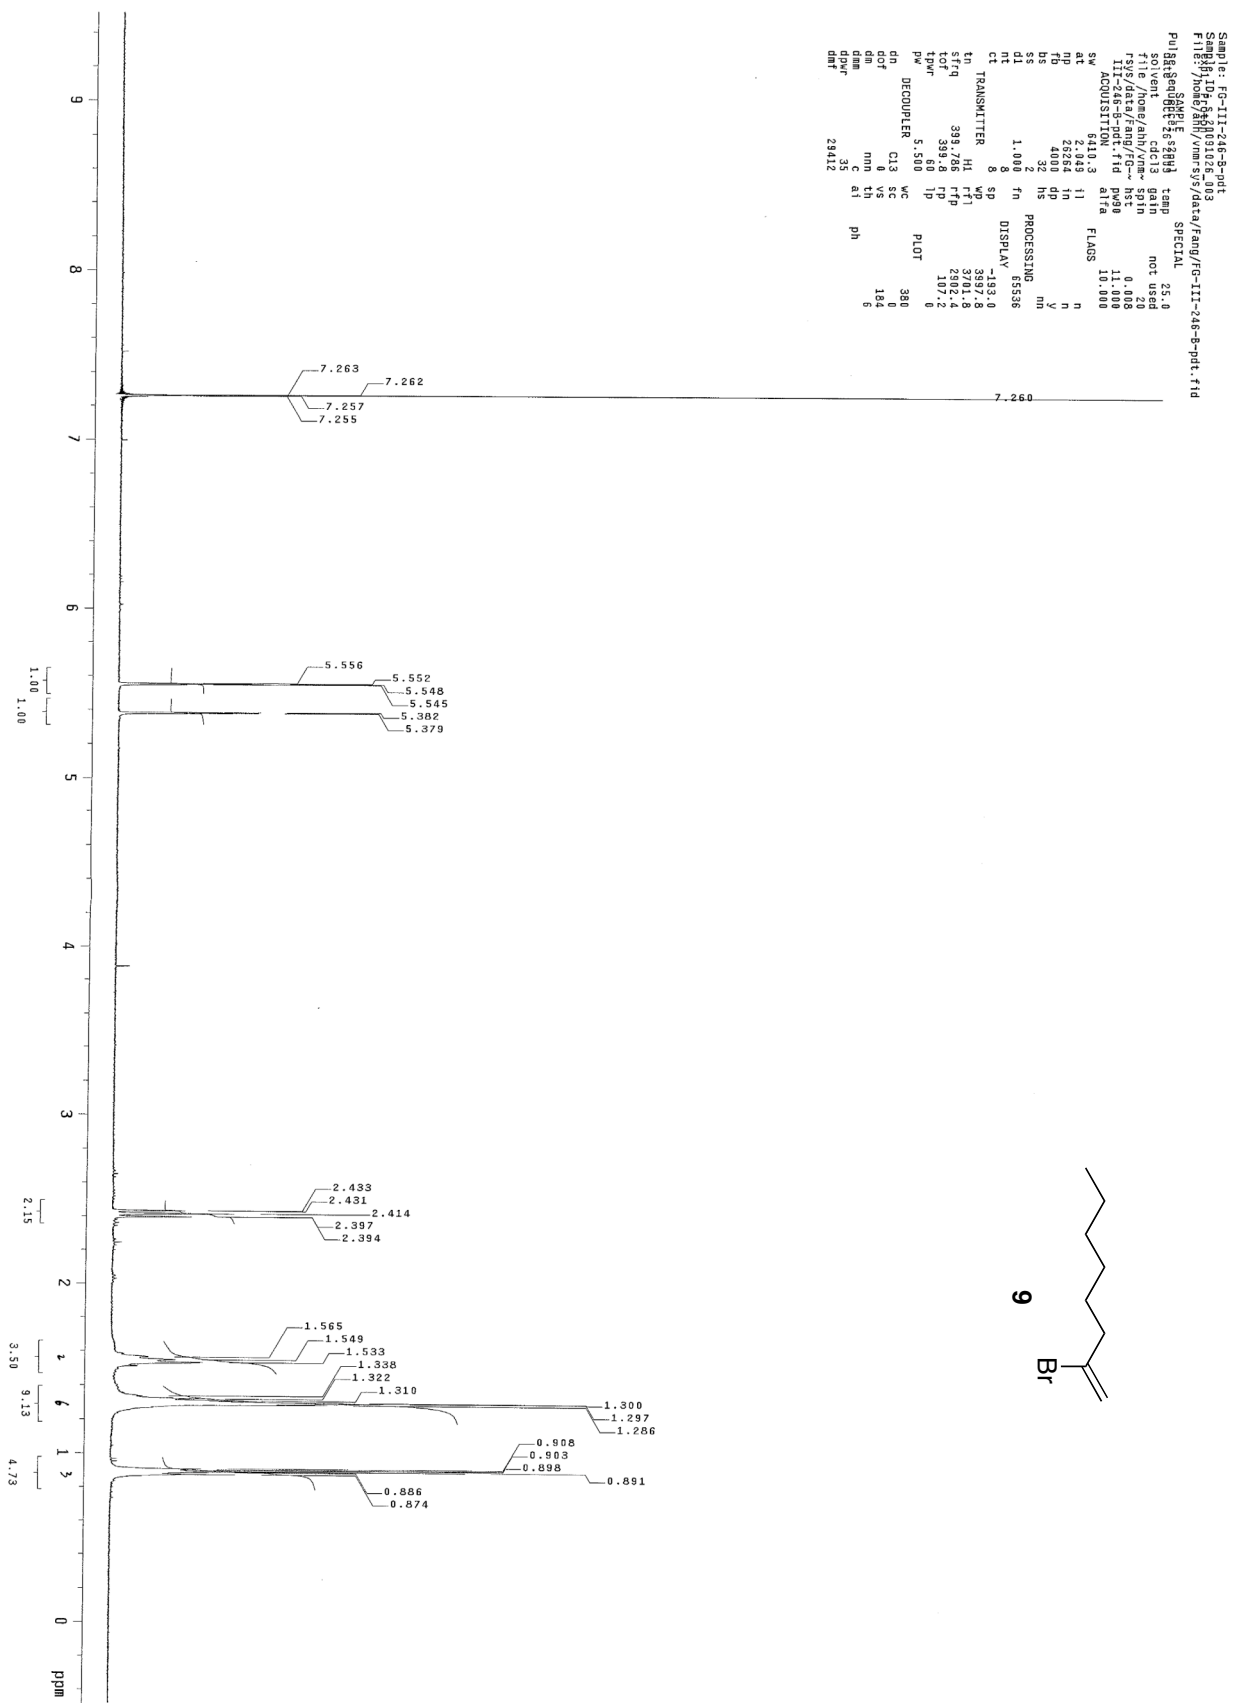



```

Sample: FG-IV-088-pdt
Sample ID: FG-IV-088-pdt_0126_002
File: /home/ab/h/vnm-32n
PulseProgram: zgpg30
Date_Time: 2010.01.26/9:59
Title: /home/ab/h/vnm-32n
SYS/Date/Study: / hst
AUO: 2010.01.26/9:59
OLV: FG-IV-088-pdt/ / a1r4
PROCNO: 11
ACQUISITION: 11
SW: 6410.3
AQ: 2.069
RG: 327.4
F2: 4000
BS: 32
SS: 1.000
SI: 2
CT: 8
TRANSMITTER: H1
F1: 2982.4
TQ: 398.248
LCF: 395.98
TPW: 60
PW: 5.500
DECOUPLER: C13
VS: 0
D1: 0
D2: 0
D3: 0
DEM: 32
RES: 0.391
DPR: 29412
SPECIAL:
temp: 25.0
not used
0.008
11.000
19.000
n
y
n
n
mm
mm
65536
PROCESSING:
DISP: 2091.0
-2091.0
3782.0
2982.4
-20.5
0
360
0
48
2
ph

```

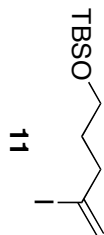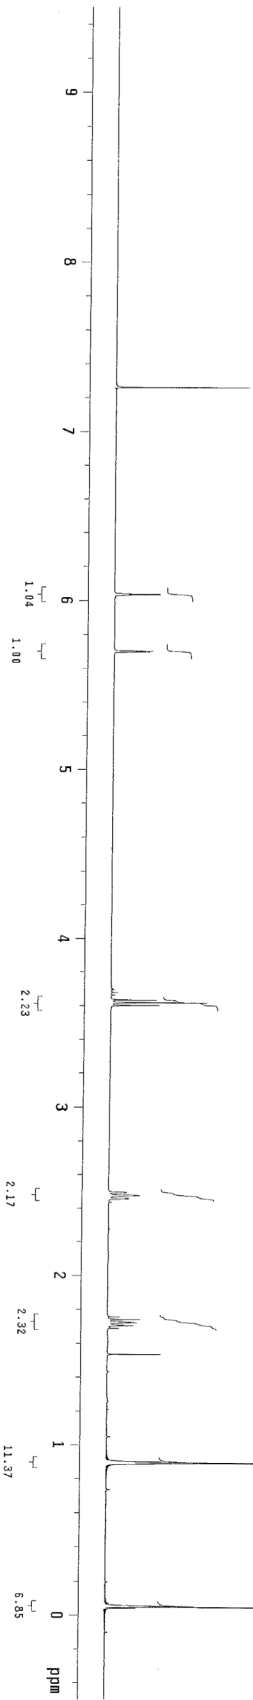

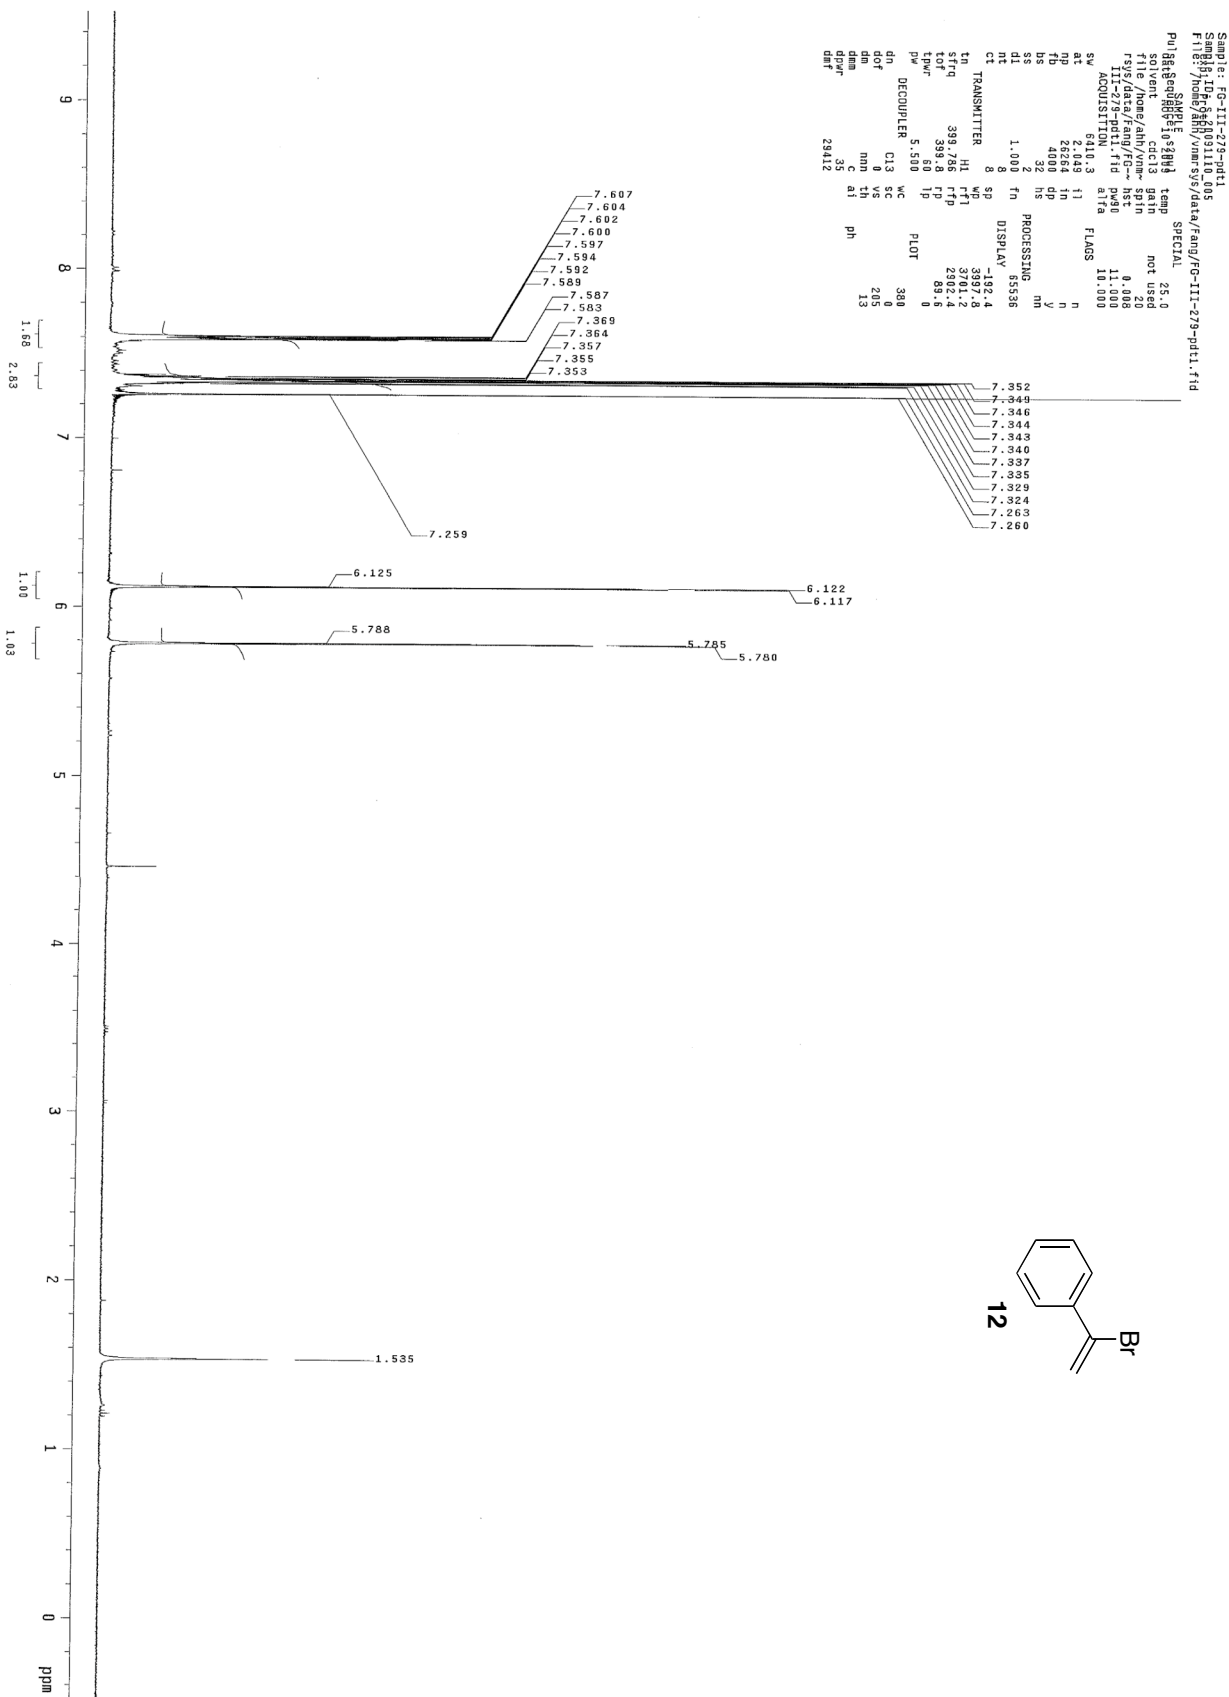

```

Sample: F0-III-235-pdt
Name: F0-III-235-pdt_009
File: /home/ahh/mmr599/data/famg/F0-III-235-pdt.fid
P1: 1.000 2.000 1.000
P2: 1.000 2.000 1.000
P3: 1.000 2.000 1.000
P4: 1.000 2.000 1.000
P5: 1.000 2.000 1.000
P6: 1.000 2.000 1.000
P7: 1.000 2.000 1.000
P8: 1.000 2.000 1.000
P9: 1.000 2.000 1.000
P10: 1.000 2.000 1.000
P11: 1.000 2.000 1.000
P12: 1.000 2.000 1.000
P13: 1.000 2.000 1.000
P14: 1.000 2.000 1.000
P15: 1.000 2.000 1.000
P16: 1.000 2.000 1.000
P17: 1.000 2.000 1.000
P18: 1.000 2.000 1.000
P19: 1.000 2.000 1.000
P20: 1.000 2.000 1.000
P21: 1.000 2.000 1.000
P22: 1.000 2.000 1.000
P23: 1.000 2.000 1.000
P24: 1.000 2.000 1.000
P25: 1.000 2.000 1.000
P26: 1.000 2.000 1.000
P27: 1.000 2.000 1.000
P28: 1.000 2.000 1.000
P29: 1.000 2.000 1.000
P30: 1.000 2.000 1.000
P31: 1.000 2.000 1.000
P32: 1.000 2.000 1.000
P33: 1.000 2.000 1.000
P34: 1.000 2.000 1.000
P35: 1.000 2.000 1.000
P36: 1.000 2.000 1.000
P37: 1.000 2.000 1.000
P38: 1.000 2.000 1.000
P39: 1.000 2.000 1.000
P40: 1.000 2.000 1.000
P41: 1.000 2.000 1.000
P42: 1.000 2.000 1.000
P43: 1.000 2.000 1.000
P44: 1.000 2.000 1.000
P45: 1.000 2.000 1.000
P46: 1.000 2.000 1.000
P47: 1.000 2.000 1.000
P48: 1.000 2.000 1.000
P49: 1.000 2.000 1.000
P50: 1.000 2.000 1.000
P51: 1.000 2.000 1.000
P52: 1.000 2.000 1.000
P53: 1.000 2.000 1.000
P54: 1.000 2.000 1.000
P55: 1.000 2.000 1.000
P56: 1.000 2.000 1.000
P57: 1.000 2.000 1.000
P58: 1.000 2.000 1.000
P59: 1.000 2.000 1.000
P60: 1.000 2.000 1.000
P61: 1.000 2.000 1.000
P62: 1.000 2.000 1.000
P63: 1.000 2.000 1.000
P64: 1.000 2.000 1.000
P65: 1.000 2.000 1.000
P66: 1.000 2.000 1.000
P67: 1.000 2.000 1.000
P68: 1.000 2.000 1.000
P69: 1.000 2.000 1.000
P70: 1.000 2.000 1.000
P71: 1.000 2.000 1.000
P72: 1.000 2.000 1.000
P73: 1.000 2.000 1.000
P74: 1.000 2.000 1.000
P75: 1.000 2.000 1.000
P76: 1.000 2.000 1.000
P77: 1.000 2.000 1.000
P78: 1.000 2.000 1.000
P79: 1.000 2.000 1.000
P80: 1.000 2.000 1.000
P81: 1.000 2.000 1.000
P82: 1.000 2.000 1.000
P83: 1.000 2.000 1.000
P84: 1.000 2.000 1.000
P85: 1.000 2.000 1.000
P86: 1.000 2.000 1.000
P87: 1.000 2.000 1.000
P88: 1.000 2.000 1.000
P89: 1.000 2.000 1.000
P90: 1.000 2.000 1.000
P91: 1.000 2.000 1.000
P92: 1.000 2.000 1.000
P93: 1.000 2.000 1.000
P94: 1.000 2.000 1.000
P95: 1.000 2.000 1.000
P96: 1.000 2.000 1.000
P97: 1.000 2.000 1.000
P98: 1.000 2.000 1.000
P99: 1.000 2.000 1.000
P100: 1.000 2.000 1.000
    
```

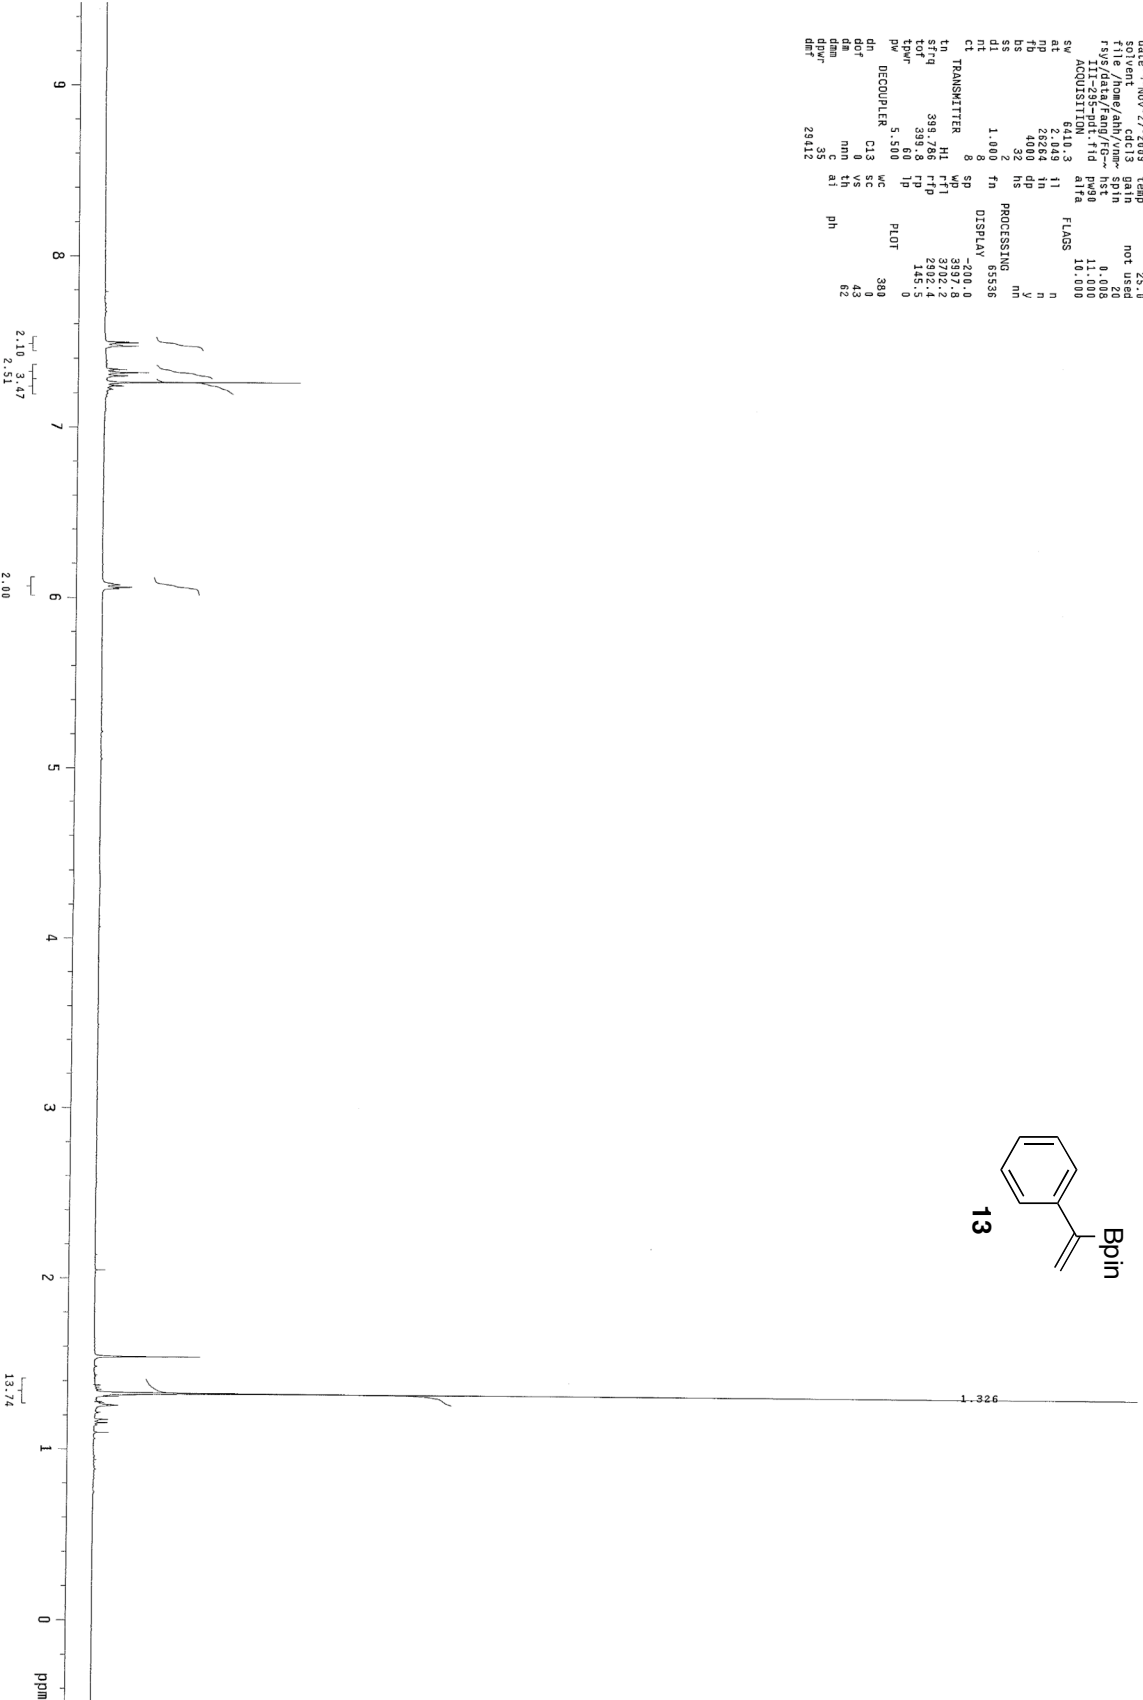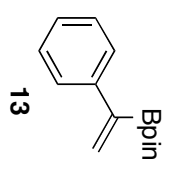

Sample: FG-IV-284-pdt  
 Sample: F010100524\_12  
 File: s\_20100524\_12\data/cdc13\_01.fid  
 SPECIAL

pubdate Setpoint: 29412  
 solvent cdc13 gain not used 25.0  
 file /home/abh/vnm- spin 20  
 rsvs/data/auto.201- hst 0.008  
 0.05-23\_01/s\_20100- pw90 11.000  
 524\_12\data/cdc13-~ atfa 10.000

01.fid  
 ACQUISITION 11  
 sw 6410.3 in n  
 at 2.049 dd y  
 np 26264 hs  
 fb 4000  
 bs 32 fn 65536  
 ss 2  
 dl 1.000 sd -200.0  
 nt 8 wd 3997.8  
 ct 8 rfp 3700.5  
 2902.4

TRANSMITTER H1  
 tn 399.786 1p 8.2  
 sfrq 399.8  
 tof 399.8  
 tpwr 5.500  
 pw 5.500  
 DECOUPLER C13  
 dn 0  
 dof 0  
 dm nm  
 dmm 35  
 dpwr 29412  
 dmf

PROCESsing nm  
 DISPLAY 65536  
 PLOT 250  
 ph 39  
 59

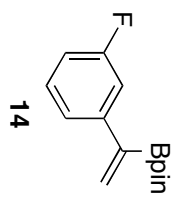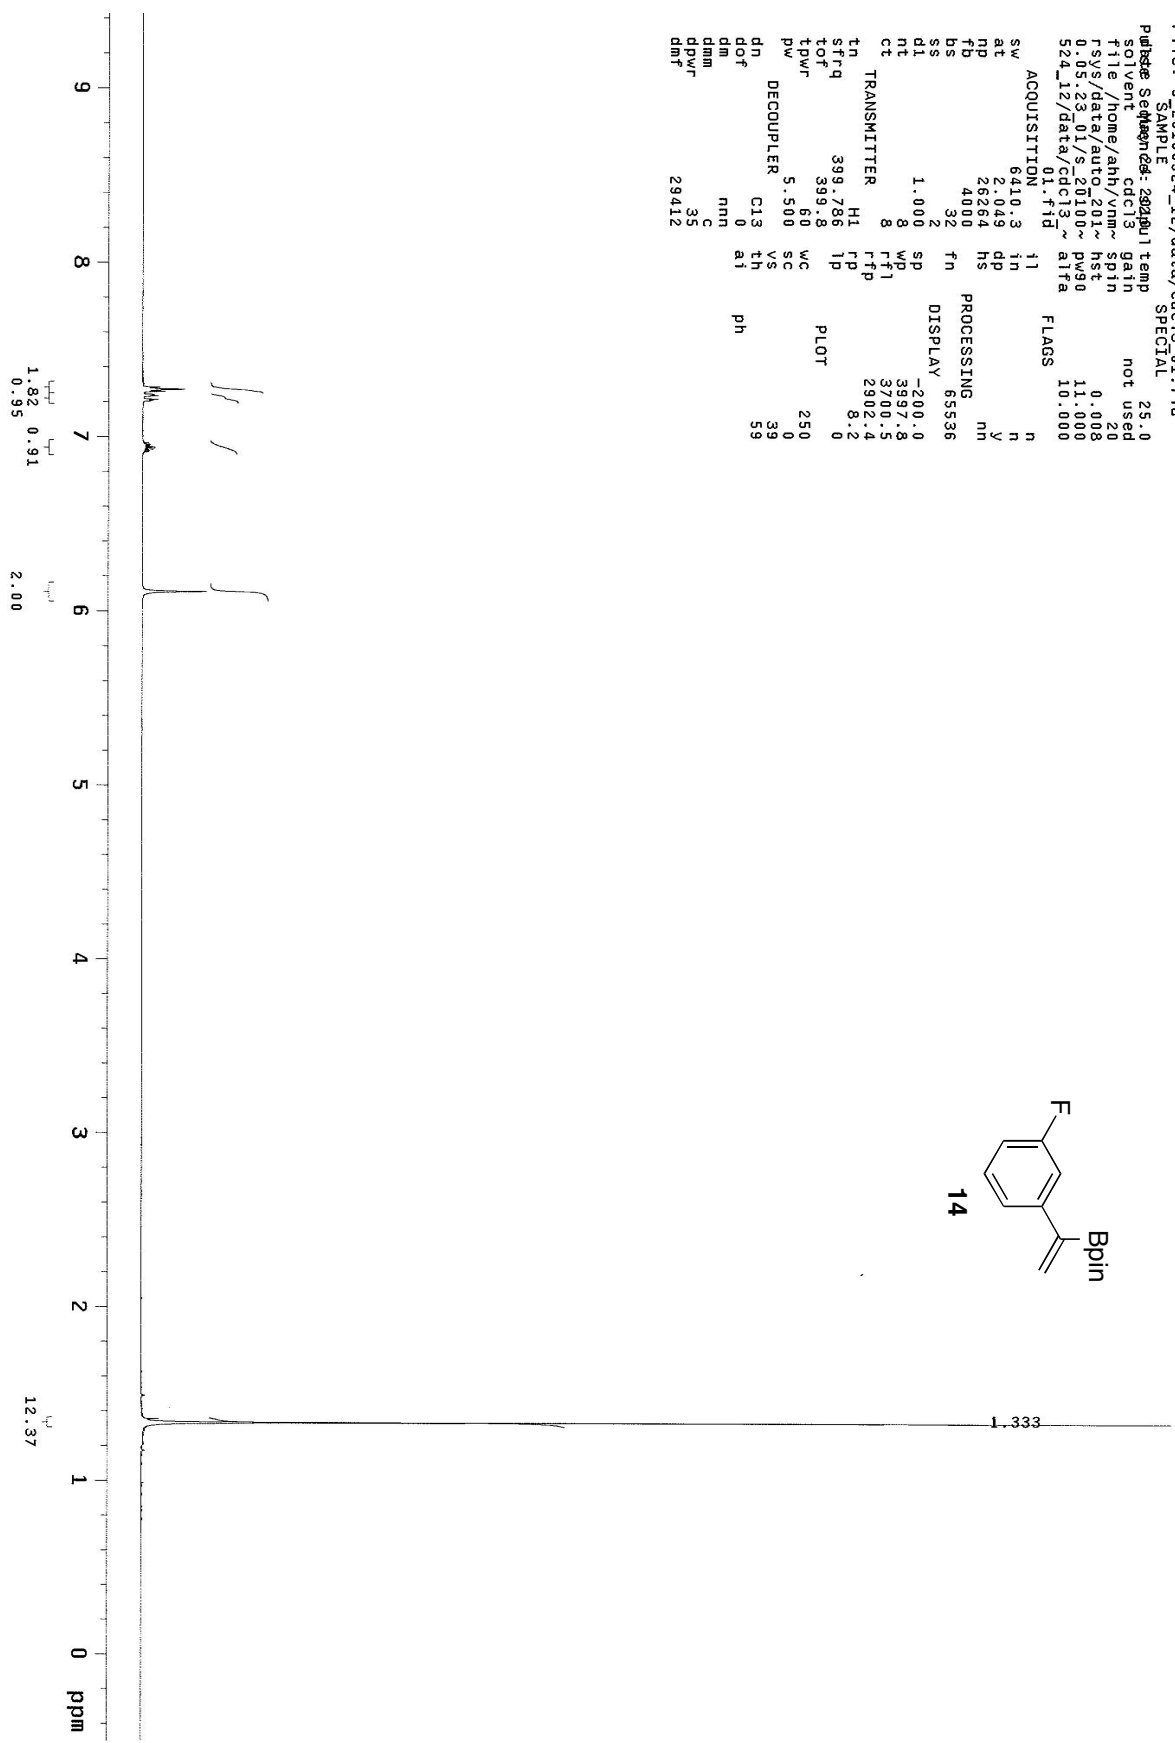

```

SM-VI-249-F
SM-VI-249-F
Sample: FG-IV-294-pdt
Sample Path: /home/ahh/vnmw/spin
File: s_20100527_08/data/cdc13_01.fid
File: s_20100527_08/data/cdc13_01.fid
SAMPLE SPECIAL
Pulse Sequence: zgpg30
Solvent: cdcl3
F1: 25.0
F2: not used
F3: 20
F4: 0.008
F5: 11.000
F6: 10.000
F7: 10.000
F8: 10.000
F9: 10.000
F10: 10.000
F11: 10.000
F12: 10.000
F13: 10.000
F14: 10.000
F15: 10.000
F16: 10.000
F17: 10.000
F18: 10.000
F19: 10.000
F20: 10.000
F21: 10.000
F22: 10.000
F23: 10.000
F24: 10.000
F25: 10.000
F26: 10.000
F27: 10.000
F28: 10.000
F29: 10.000
F30: 10.000
F31: 10.000
F32: 10.000
F33: 10.000
F34: 10.000
F35: 10.000
F36: 10.000
F37: 10.000
F38: 10.000
F39: 10.000
F40: 10.000
F41: 10.000
F42: 10.000
F43: 10.000
F44: 10.000
F45: 10.000
F46: 10.000
F47: 10.000
F48: 10.000
F49: 10.000
F50: 10.000
F51: 10.000
F52: 10.000
F53: 10.000
F54: 10.000
F55: 10.000
F56: 10.000
F57: 10.000
F58: 10.000
F59: 10.000
F60: 10.000
F61: 10.000
F62: 10.000
F63: 10.000
F64: 10.000
F65: 10.000
F66: 10.000
F67: 10.000
F68: 10.000
F69: 10.000
F70: 10.000
F71: 10.000
F72: 10.000
F73: 10.000
F74: 10.000
F75: 10.000
F76: 10.000
F77: 10.000
F78: 10.000
F79: 10.000
F80: 10.000
F81: 10.000
F82: 10.000
F83: 10.000
F84: 10.000
F85: 10.000
F86: 10.000
F87: 10.000
F88: 10.000
F89: 10.000
F90: 10.000
F91: 10.000
F92: 10.000
F93: 10.000
F94: 10.000
F95: 10.000
F96: 10.000
F97: 10.000
F98: 10.000
F99: 10.000
F100: 10.000

```

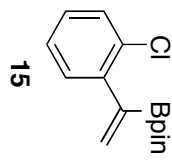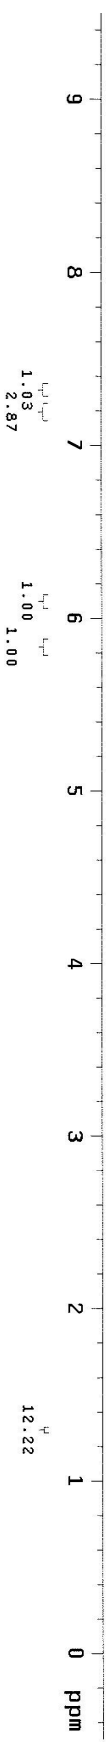





```

Sample: FC-14-23-044
Sample ID: 17010017
F1 F2: 2813519_04/data/cdc13_01.f1d
P1: 2813519_04/data/cdc13_01.f1d
P2: 2813519_04/data/cdc13_01.f1d
P3: 2813519_04/data/cdc13_01.f1d
P4: 2813519_04/data/cdc13_01.f1d
P5: 2813519_04/data/cdc13_01.f1d
P6: 2813519_04/data/cdc13_01.f1d
P7: 2813519_04/data/cdc13_01.f1d
P8: 2813519_04/data/cdc13_01.f1d
P9: 2813519_04/data/cdc13_01.f1d
P10: 2813519_04/data/cdc13_01.f1d
P11: 2813519_04/data/cdc13_01.f1d
P12: 2813519_04/data/cdc13_01.f1d
P13: 2813519_04/data/cdc13_01.f1d
P14: 2813519_04/data/cdc13_01.f1d
P15: 2813519_04/data/cdc13_01.f1d
P16: 2813519_04/data/cdc13_01.f1d
P17: 2813519_04/data/cdc13_01.f1d
P18: 2813519_04/data/cdc13_01.f1d
P19: 2813519_04/data/cdc13_01.f1d
P20: 2813519_04/data/cdc13_01.f1d
P21: 2813519_04/data/cdc13_01.f1d
P22: 2813519_04/data/cdc13_01.f1d
P23: 2813519_04/data/cdc13_01.f1d
P24: 2813519_04/data/cdc13_01.f1d
P25: 2813519_04/data/cdc13_01.f1d
P26: 2813519_04/data/cdc13_01.f1d
P27: 2813519_04/data/cdc13_01.f1d
P28: 2813519_04/data/cdc13_01.f1d
P29: 2813519_04/data/cdc13_01.f1d
P30: 2813519_04/data/cdc13_01.f1d
P31: 2813519_04/data/cdc13_01.f1d
P32: 2813519_04/data/cdc13_01.f1d
P33: 2813519_04/data/cdc13_01.f1d
P34: 2813519_04/data/cdc13_01.f1d
P35: 2813519_04/data/cdc13_01.f1d
P36: 2813519_04/data/cdc13_01.f1d
P37: 2813519_04/data/cdc13_01.f1d
P38: 2813519_04/data/cdc13_01.f1d
P39: 2813519_04/data/cdc13_01.f1d
P40: 2813519_04/data/cdc13_01.f1d
P41: 2813519_04/data/cdc13_01.f1d
P42: 2813519_04/data/cdc13_01.f1d
P43: 2813519_04/data/cdc13_01.f1d
P44: 2813519_04/data/cdc13_01.f1d
P45: 2813519_04/data/cdc13_01.f1d
P46: 2813519_04/data/cdc13_01.f1d
P47: 2813519_04/data/cdc13_01.f1d
P48: 2813519_04/data/cdc13_01.f1d
P49: 2813519_04/data/cdc13_01.f1d
P50: 2813519_04/data/cdc13_01.f1d
P51: 2813519_04/data/cdc13_01.f1d
P52: 2813519_04/data/cdc13_01.f1d
P53: 2813519_04/data/cdc13_01.f1d
P54: 2813519_04/data/cdc13_01.f1d
P55: 2813519_04/data/cdc13_01.f1d
P56: 2813519_04/data/cdc13_01.f1d
P57: 2813519_04/data/cdc13_01.f1d
P58: 2813519_04/data/cdc13_01.f1d
P59: 2813519_04/data/cdc13_01.f1d
P60: 2813519_04/data/cdc13_01.f1d
P61: 2813519_04/data/cdc13_01.f1d
P62: 2813519_04/data/cdc13_01.f1d
P63: 2813519_04/data/cdc13_01.f1d
P64: 2813519_04/data/cdc13_01.f1d
P65: 2813519_04/data/cdc13_01.f1d
P66: 2813519_04/data/cdc13_01.f1d
P67: 2813519_04/data/cdc13_01.f1d
P68: 2813519_04/data/cdc13_01.f1d
P69: 2813519_04/data/cdc13_01.f1d
P70: 2813519_04/data/cdc13_01.f1d
P71: 2813519_04/data/cdc13_01.f1d
P72: 2813519_04/data/cdc13_01.f1d
P73: 2813519_04/data/cdc13_01.f1d
P74: 2813519_04/data/cdc13_01.f1d
P75: 2813519_04/data/cdc13_01.f1d
P76: 2813519_04/data/cdc13_01.f1d
P77: 2813519_04/data/cdc13_01.f1d
P78: 2813519_04/data/cdc13_01.f1d
P79: 2813519_04/data/cdc13_01.f1d
P80: 2813519_04/data/cdc13_01.f1d
P81: 2813519_04/data/cdc13_01.f1d
P82: 2813519_04/data/cdc13_01.f1d
P83: 2813519_04/data/cdc13_01.f1d
P84: 2813519_04/data/cdc13_01.f1d
P85: 2813519_04/data/cdc13_01.f1d
P86: 2813519_04/data/cdc13_01.f1d
P87: 2813519_04/data/cdc13_01.f1d
P88: 2813519_04/data/cdc13_01.f1d
P89: 2813519_04/data/cdc13_01.f1d
P90: 2813519_04/data/cdc13_01.f1d
P91: 2813519_04/data/cdc13_01.f1d
P92: 2813519_04/data/cdc13_01.f1d
P93: 2813519_04/data/cdc13_01.f1d
P94: 2813519_04/data/cdc13_01.f1d
P95: 2813519_04/data/cdc13_01.f1d
P96: 2813519_04/data/cdc13_01.f1d
P97: 2813519_04/data/cdc13_01.f1d
P98: 2813519_04/data/cdc13_01.f1d
P99: 2813519_04/data/cdc13_01.f1d
P100: 2813519_04/data/cdc13_01.f1d

```

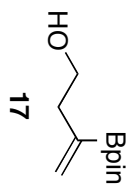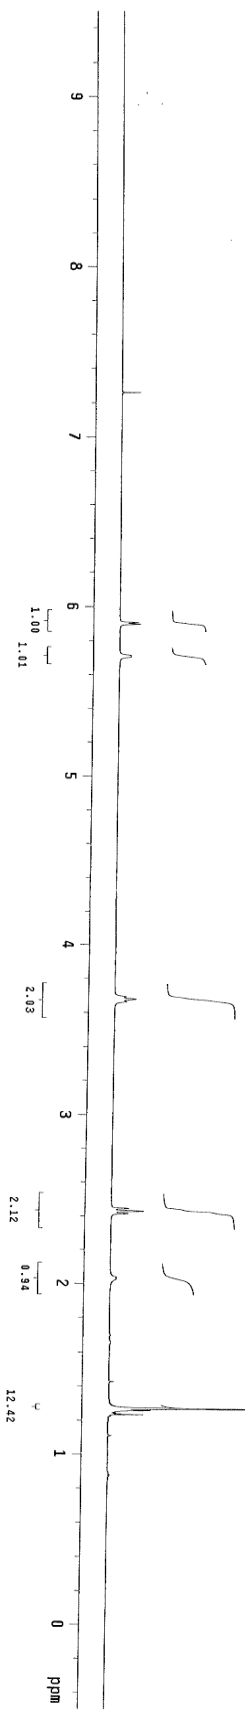



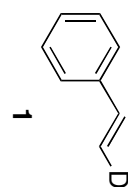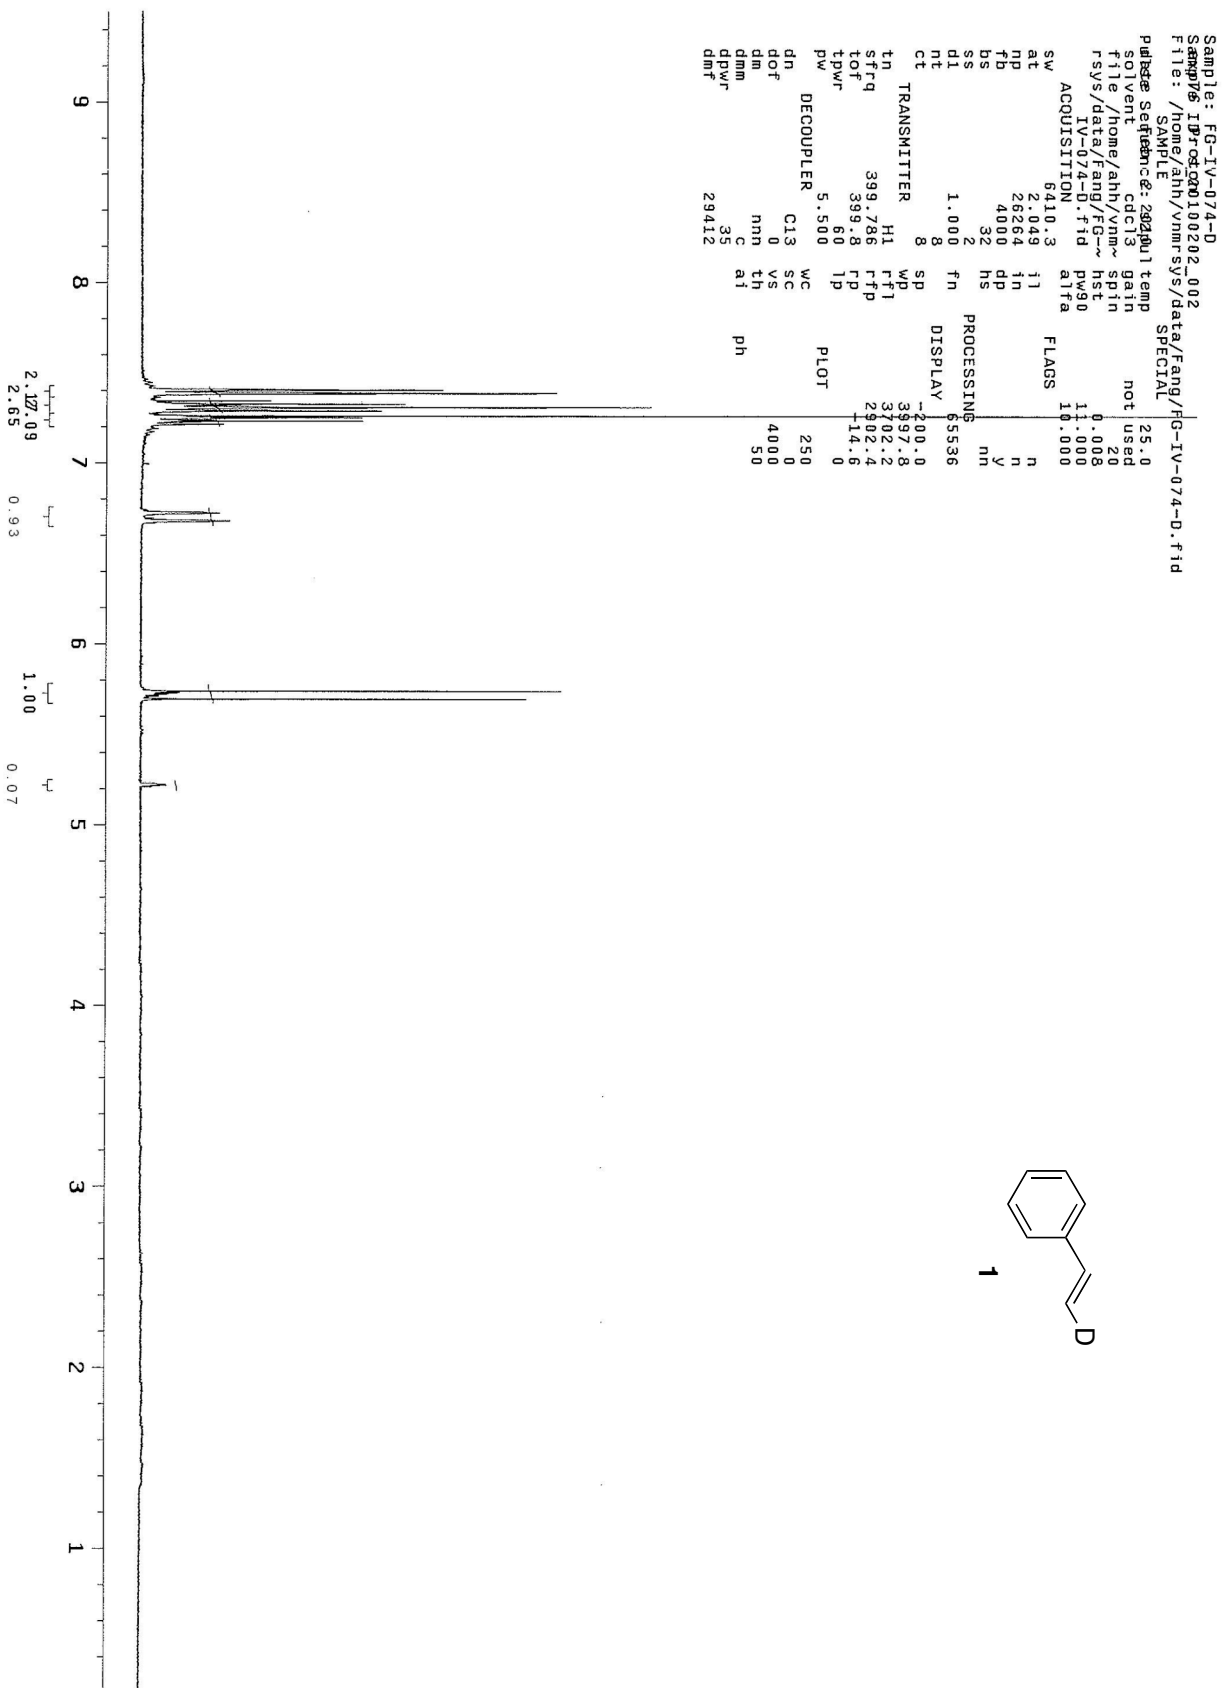

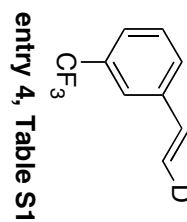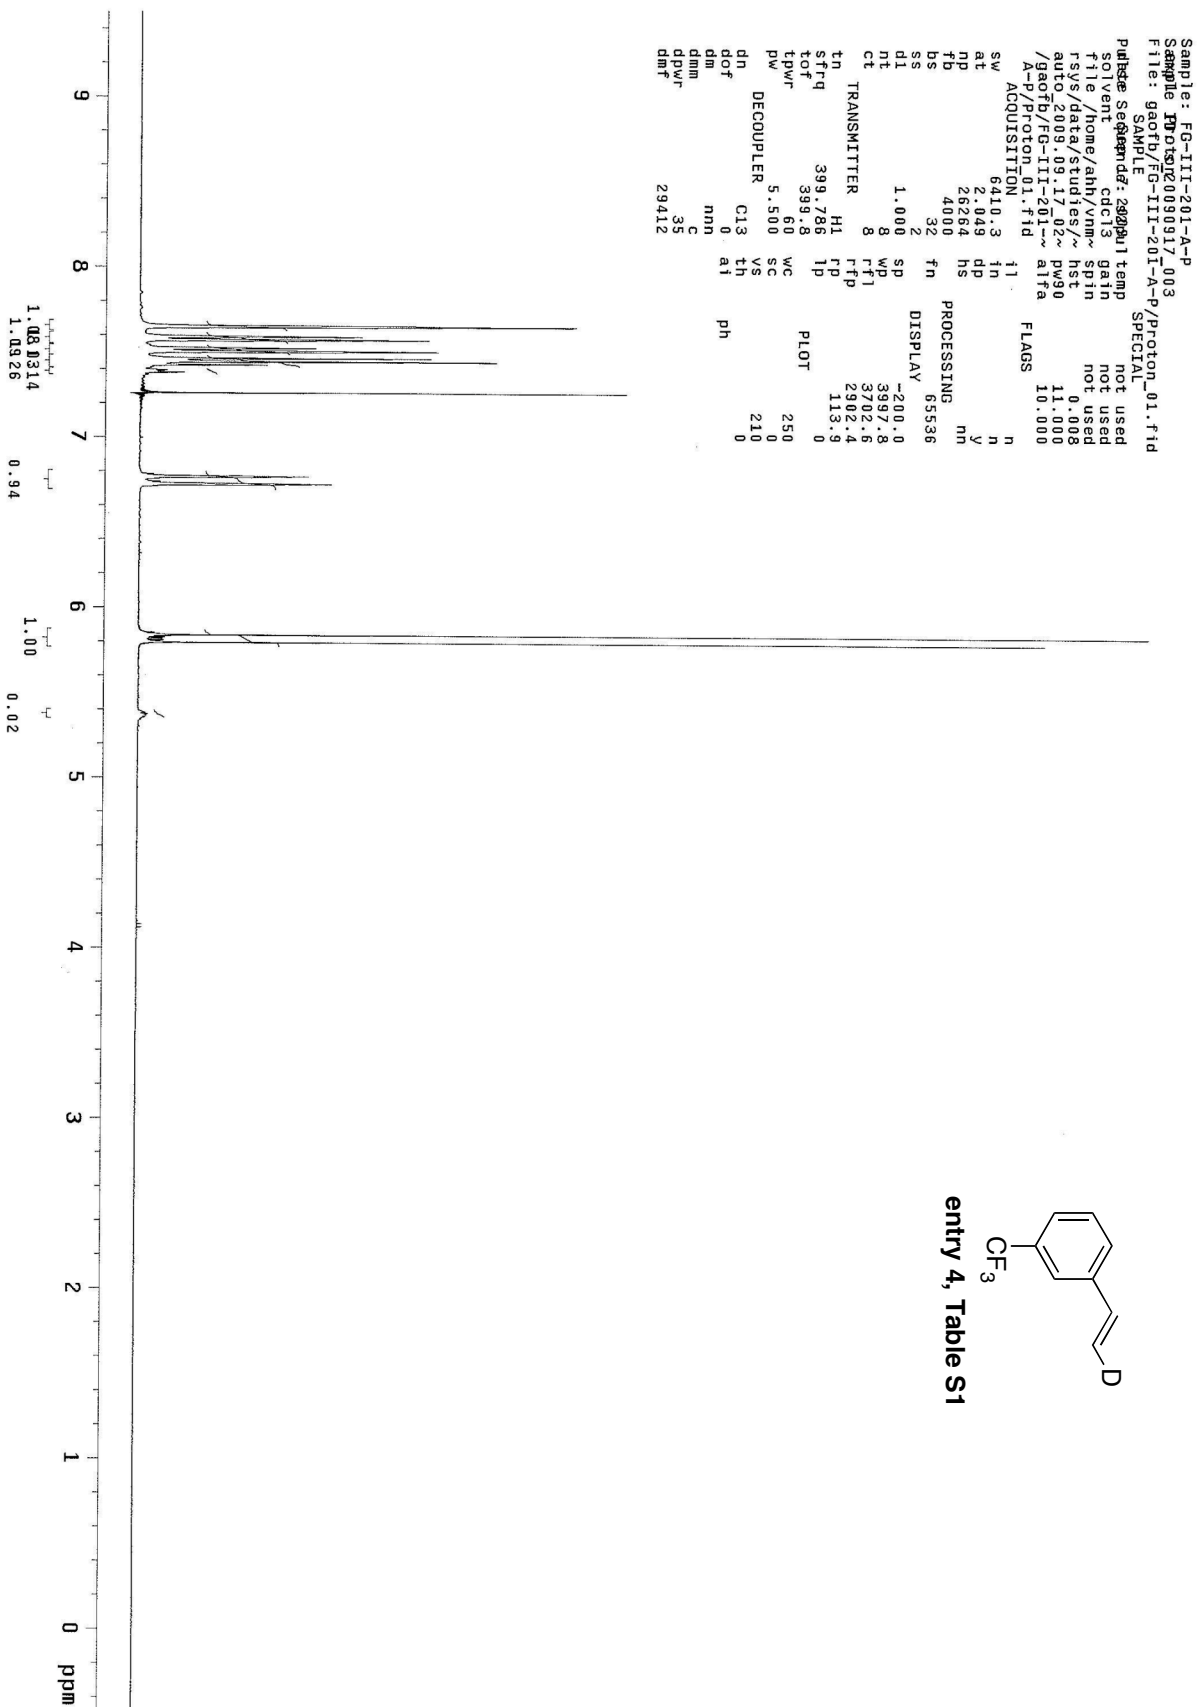

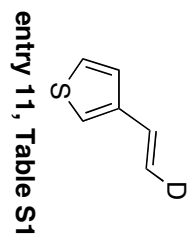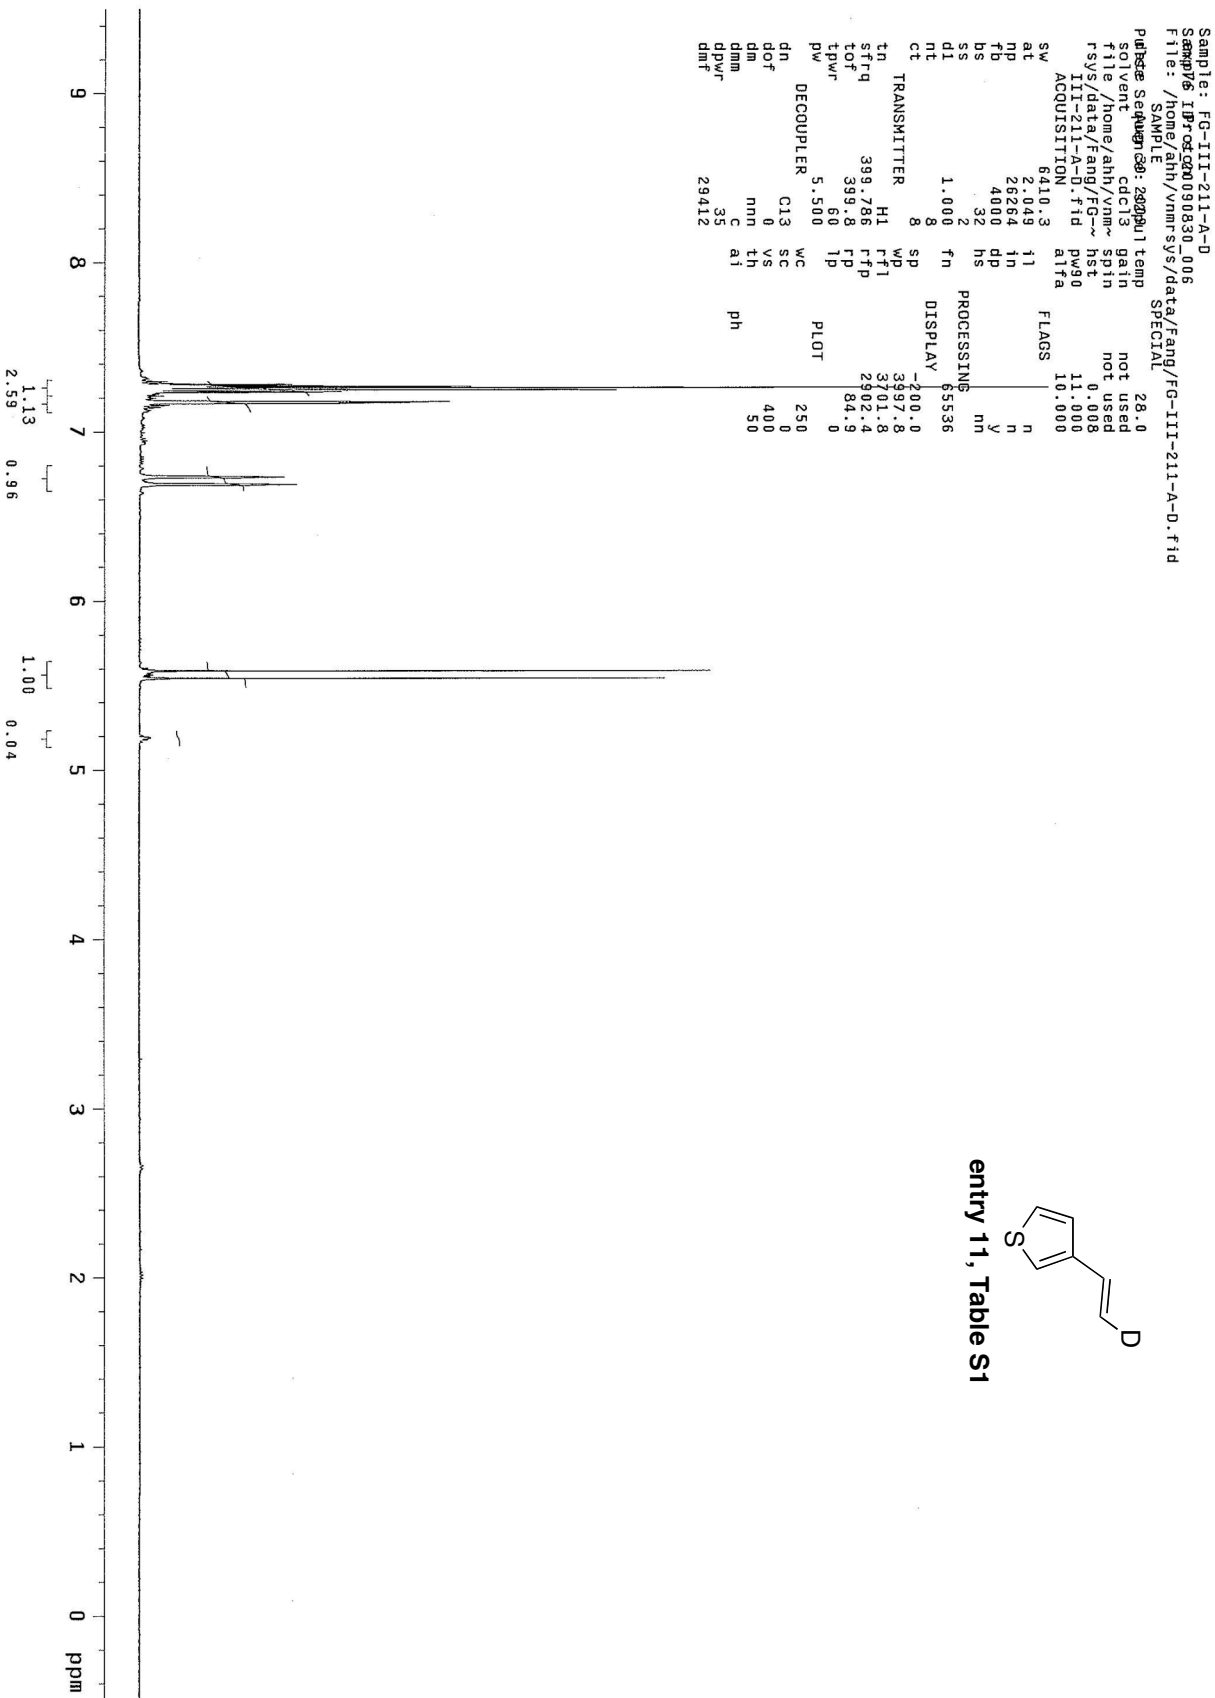

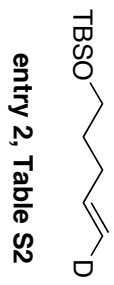

```

Sample: FG-III-221-D
Sample6: IProc00090908_005
File: /home/ahh/vnmrsys/data/fg/fg-III-221-D.fid
NAME: SAMPLE
PROCNO: 2902411
Pulse Sequence: cdc13 gain not used
SOLVENT: /home/ahh/vnmr sys/spin not used
File: /home/ahh/vnmr sys/data/fg/fg-III-221-D.fid hst 0.008
III-221-D.fid pw90 11.000
ACQUISITION: aifa 10.000
SW 6410.3
AL 2.049
F2 26264
F1 400
H2 32
H1 1.002
S2
S1
S0
CT 8
TR 8
TRANSMITTER H1
SFRQ 399.786
IOF 399.8
TDWR 60
PW 5.500
DECOUPLER WC
DN C13
DOF 0
DM VS
DMM nnn
DPMW C
DMF 35
29412
    
```

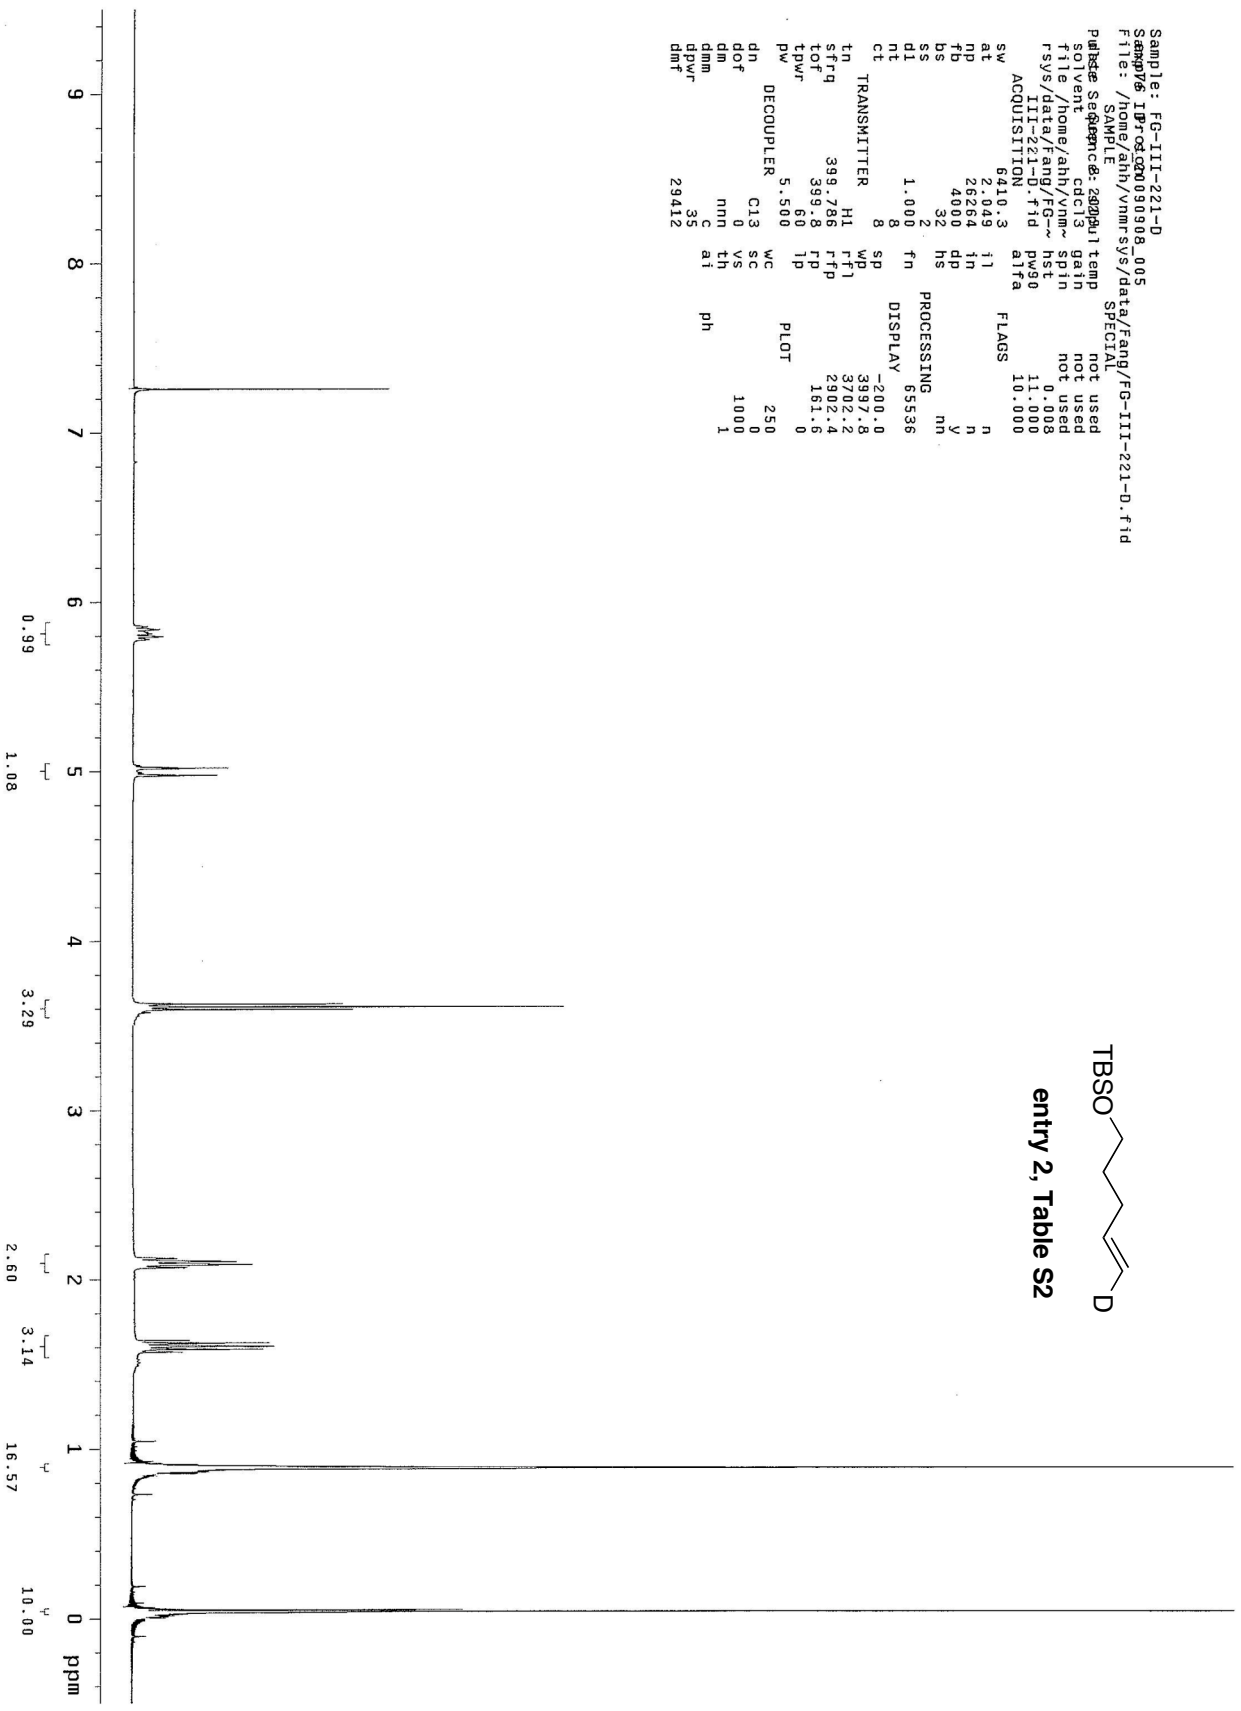

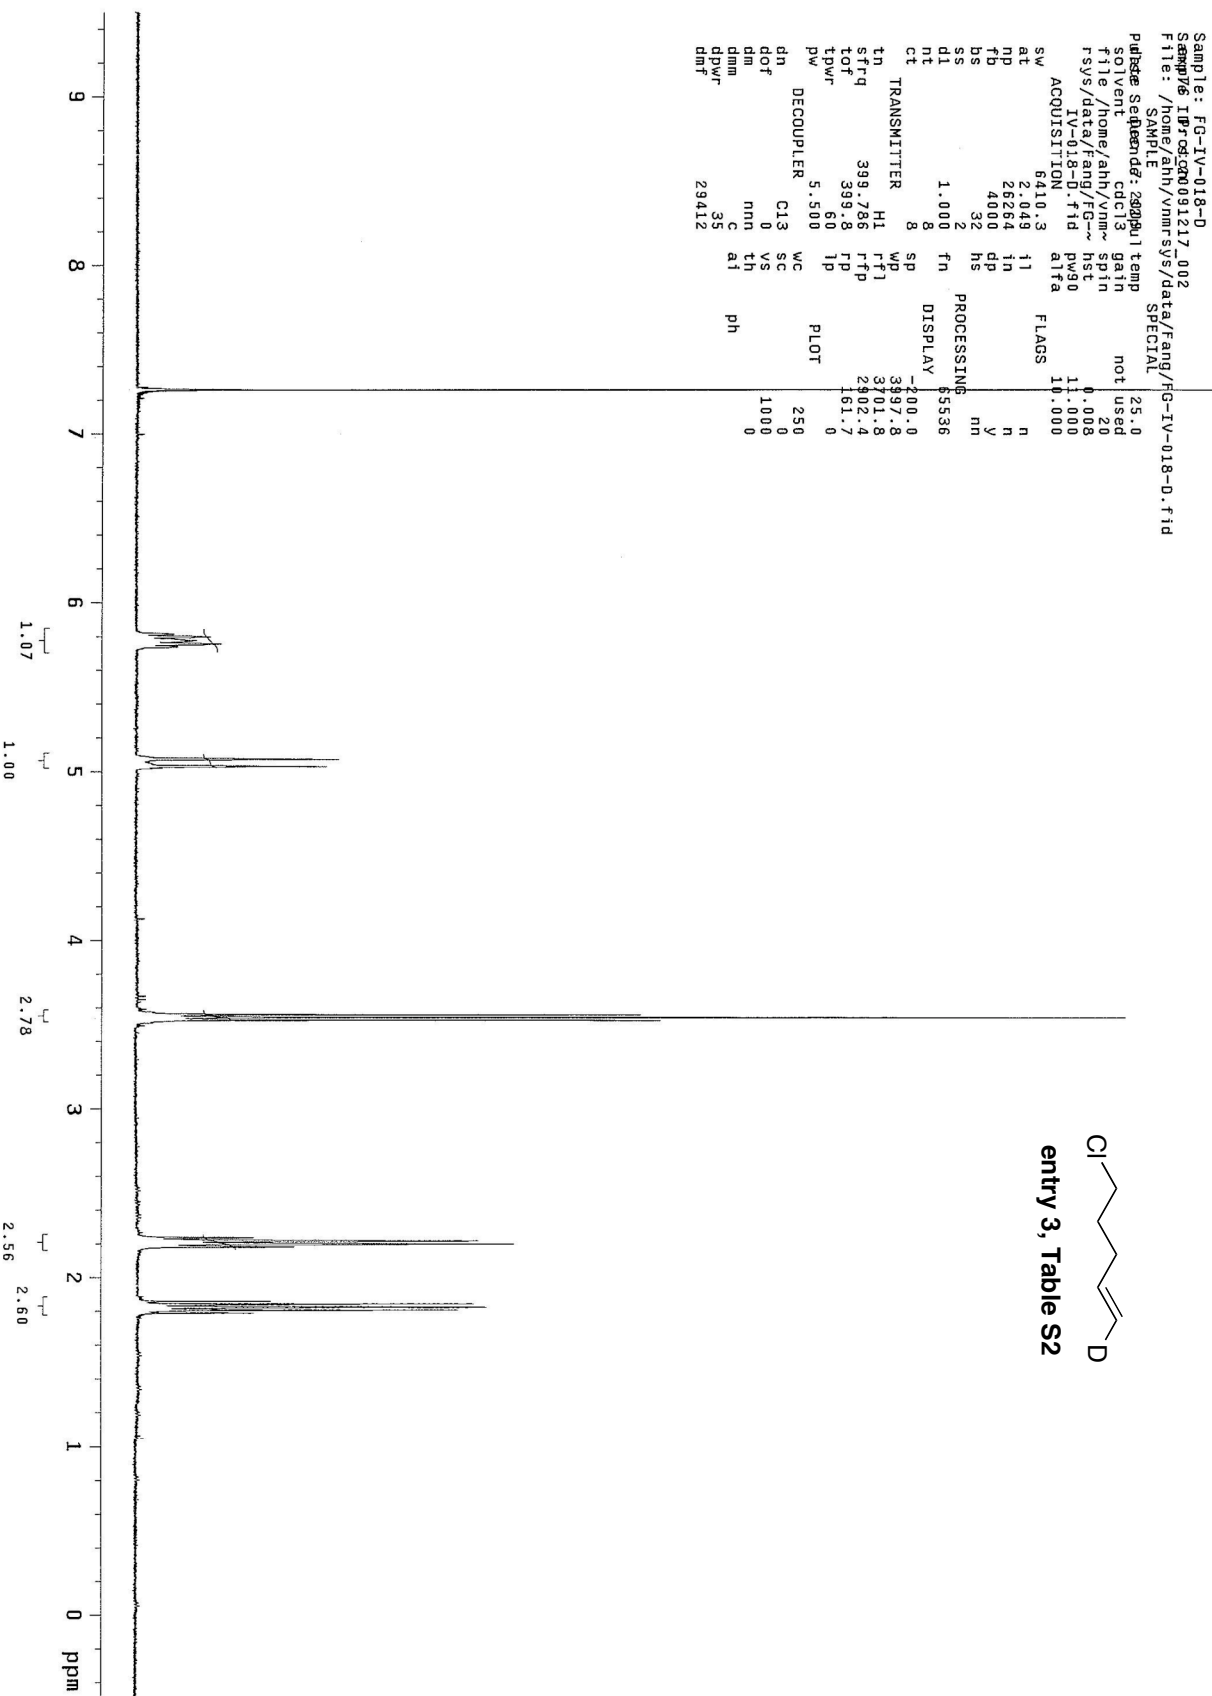





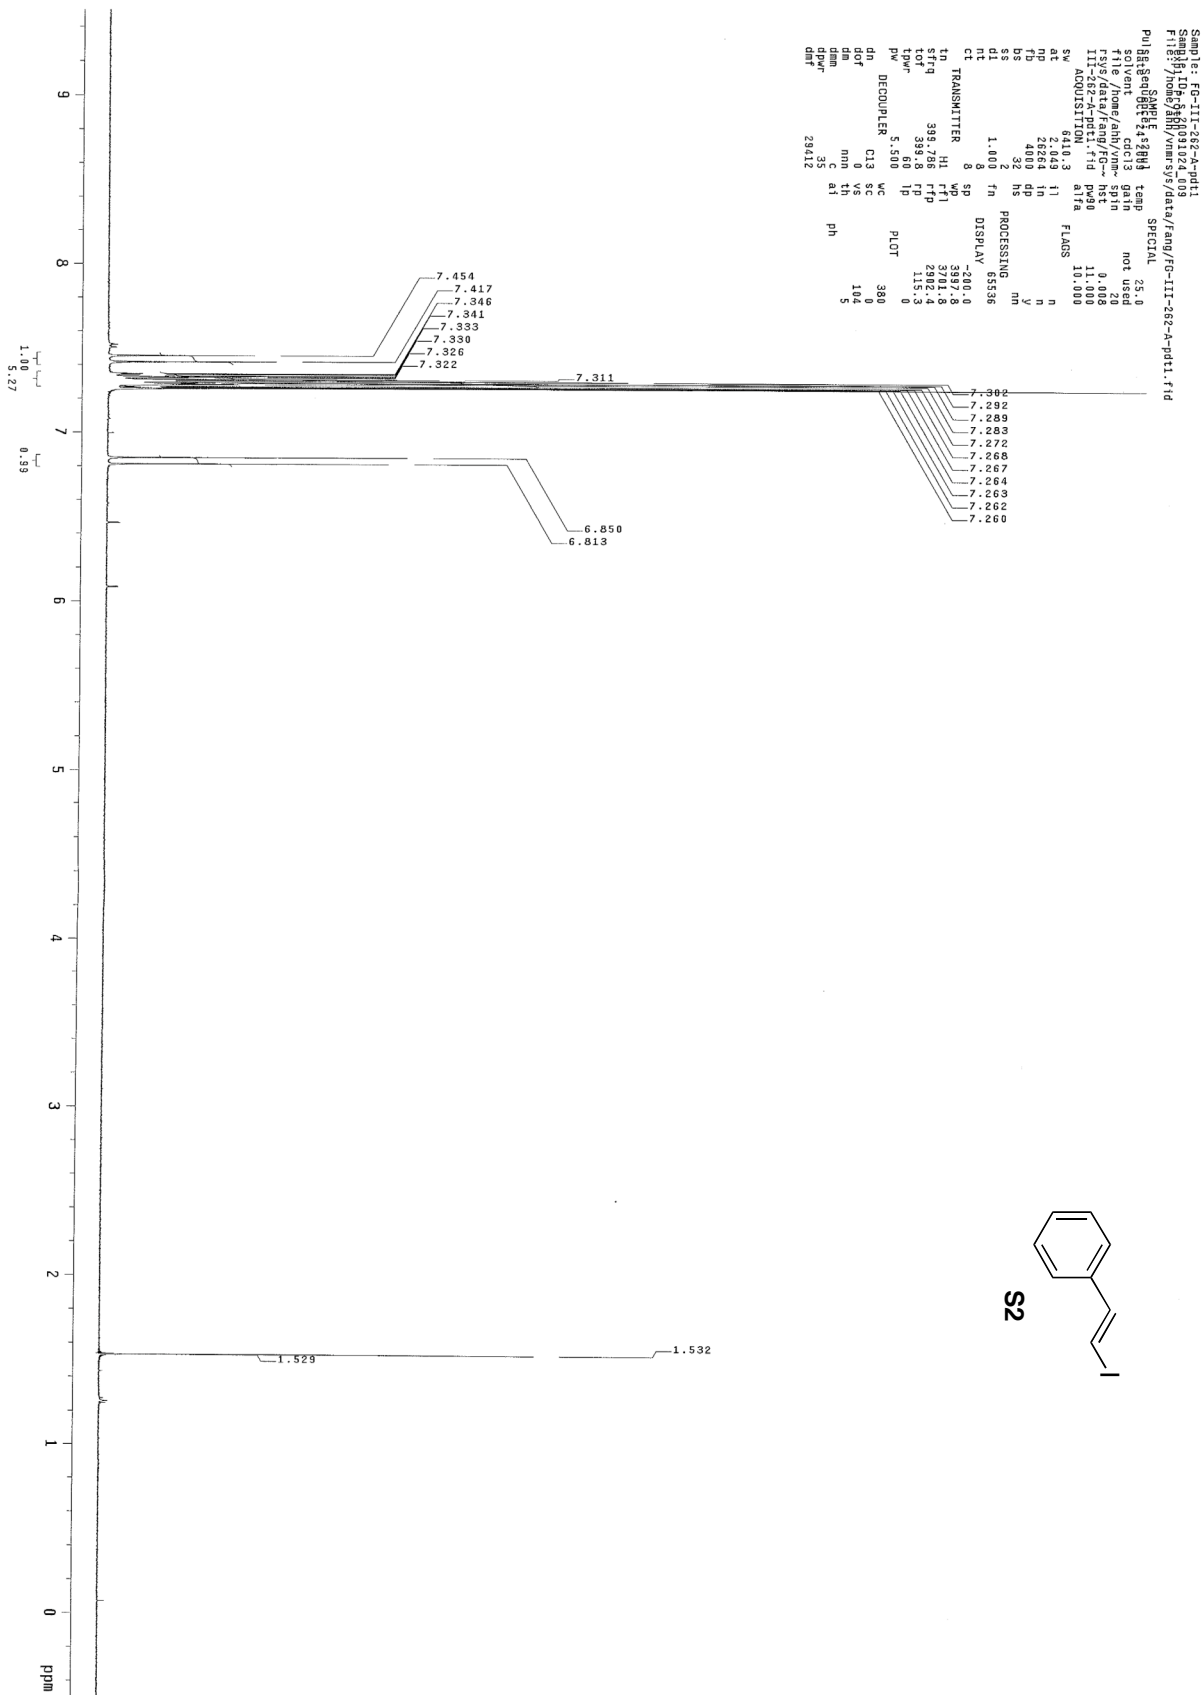

Supplement: NIHMS222574-supplement-2_si_002.pdf [file NIHMS222574-supplement-2_si_002.pdf]
